# Supplementary material for: Ruthenium complexes of phosphine–amide based ligands as efficient catalysts for transfer hydrogenation reactions
Source: Royal Society of Chemistry journal article supplement (doi:10.1039/d0dt04401f), 2021-01-01
Supplement: d0dt04401f1.pdf [file d0dt04401f1.pdf]

## **Electronic Supplementary Information**

**for the manuscript entitled**

### **Ruthenium complexes of phosphine-amide based ligands as efficient catalysts for transfer hydrogenation reactions**

Samanta Yadav, Paranthaman Vijayan, Sunil Yadav and Rajeev Gupta\*

Department of Chemistry, University of Delhi, Delhi 110007, India

E-mail: [rgupta@chemistry.du.ac.in](mailto:rgupta@chemistry.du.ac.in)

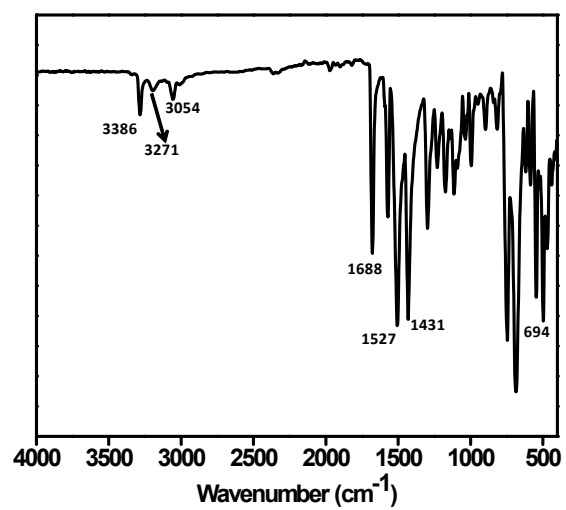

**Figure S1.** FTIR spectrum of ligand HL<sup>1</sup>.

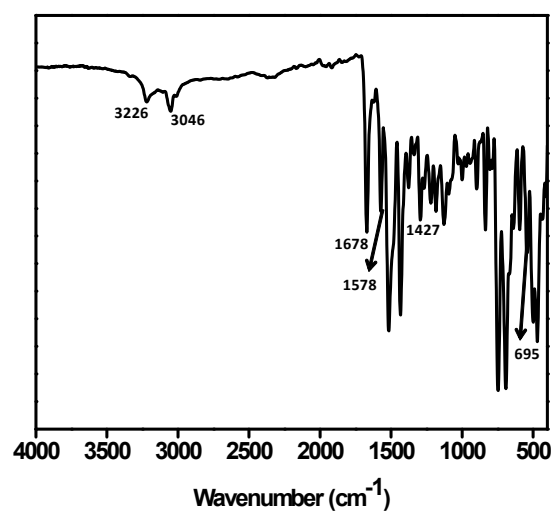

**Figure S2.** FTIR spectrum of ligand HL<sup>2</sup>.

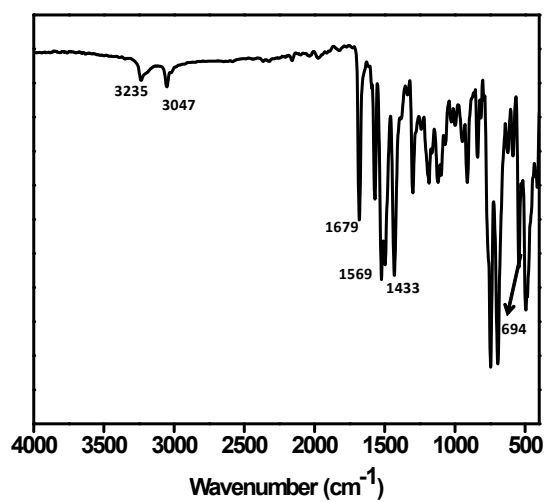

Figure S3. FTIR spectrum of ligand **HL<sup>3</sup>**.

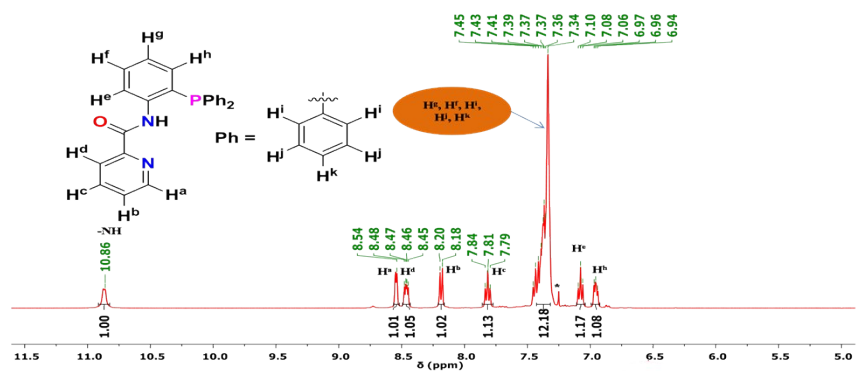

Figure S4. Selected part of  $^1\text{H}$  NMR spectrum of ligand **HL<sup>1</sup>** in  $\text{CDCl}_3$ .

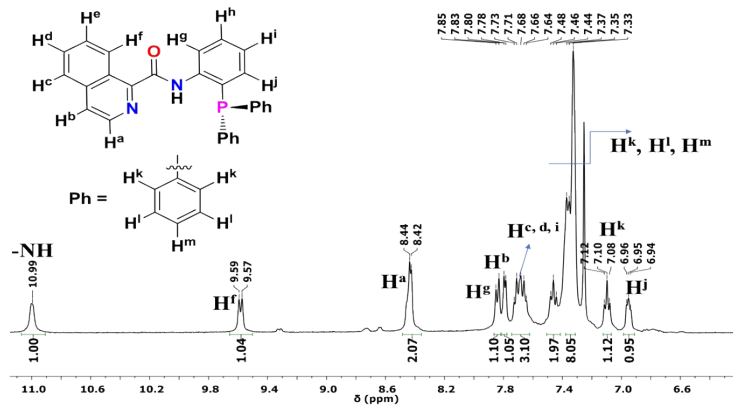

Figure S5. Selected part of  $^1\text{H}$  NMR spectrum of ligand **HL<sup>2</sup>** in  $\text{CDCl}_3$ .

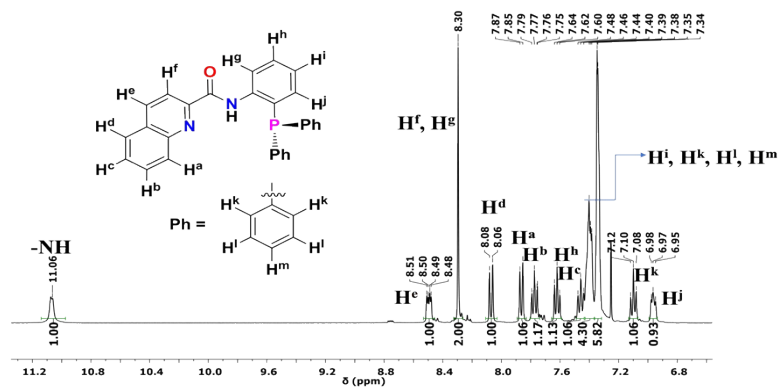

Figure S6. Selected part of  $^1\text{H}$  NMR spectrum of ligand  $\text{HL}^3$  in  $\text{CDCl}_3$ .

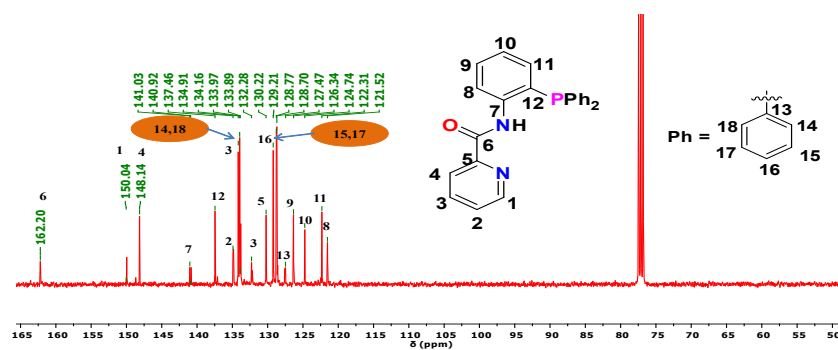

Figure S7. Selected part of  $^{13}\text{C}$  NMR spectrum of ligand  $\text{HL}^1$  in  $\text{CDCl}_3$ .

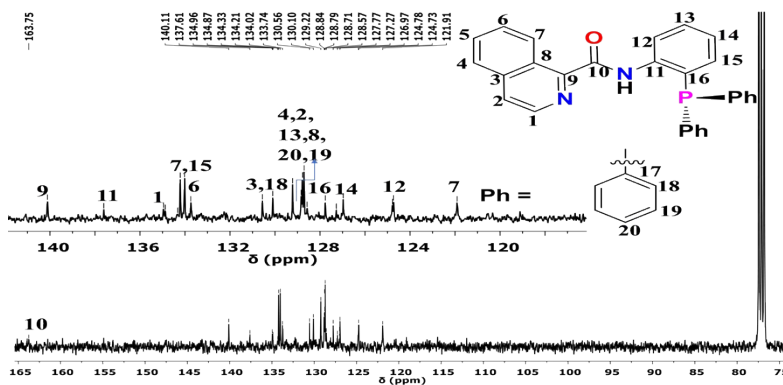

Figure S8. Selected part of  $^{13}\text{C}$  NMR spectrum of ligand  $\text{HL}^2$  in  $\text{CDCl}_3$ .

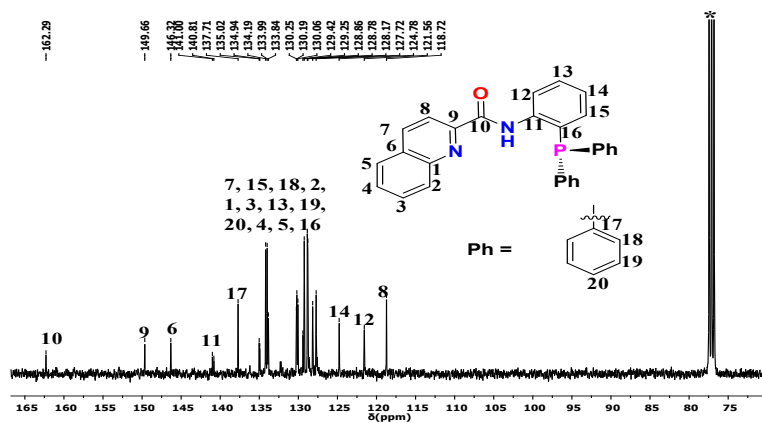

Figure S9. Selected part of  $^{13}\text{C}$  NMR spectrum of ligand  $\text{HL}^3$  in  $\text{CDCl}_3$ .

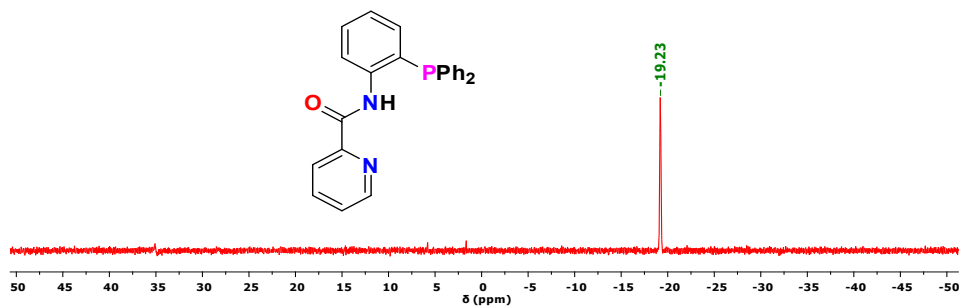

Figure S10. Selected part of  $^{31}\text{P}$  NMR spectrum of ligand  $\text{HL}^1$  in  $\text{CDCl}_3$ .

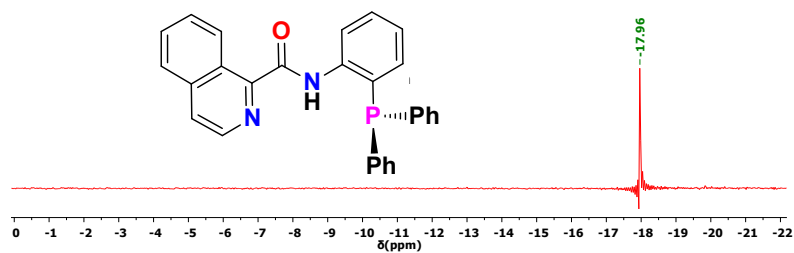

Figure S11. Selected part of  $^{31}\text{P}$  NMR spectrum of ligand  $\text{HL}^2$  in  $\text{CDCl}_3$ .

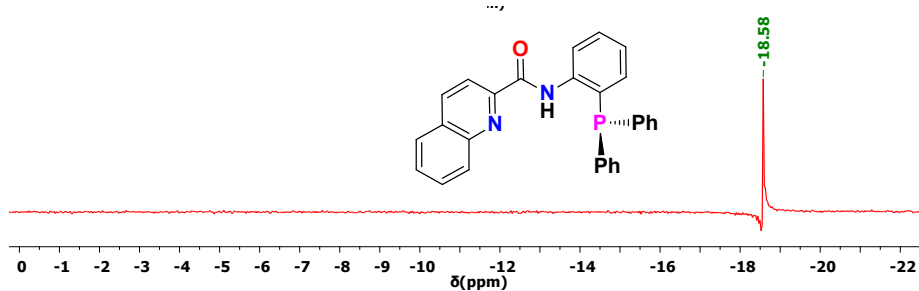

**Figure S12.** Selected part of  $^{31}\text{P}$  NMR spectrum of ligand **HL<sup>3</sup>** in  $\text{CDCl}_3$ .

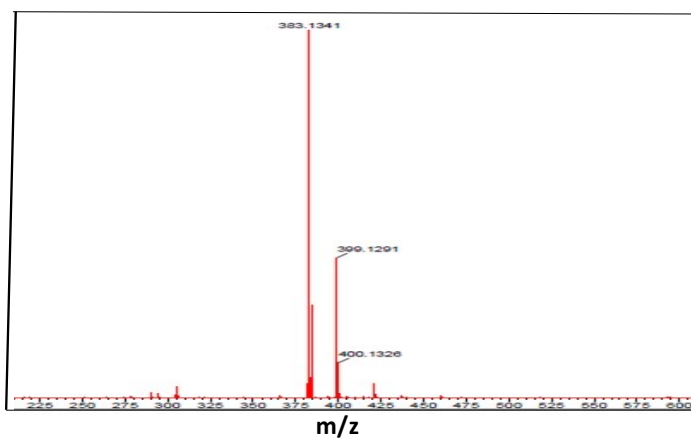

**Figure 13.**  $\text{ESI}^+$ -MS spectrum of ligand **HL<sup>1</sup>** in MeOH.

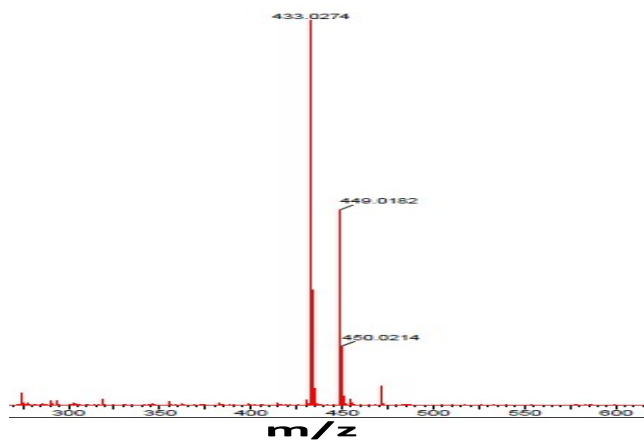

**Figure 14.**  $\text{ESI}^+$ -MS spectrum of ligand **HL<sup>2</sup>** in MeOH.

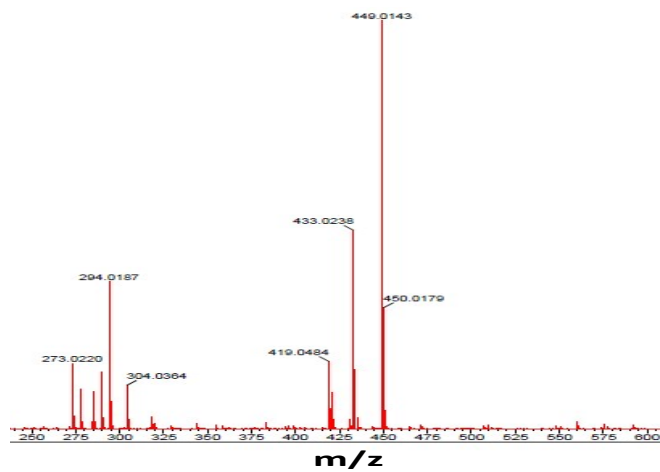

**Figure 15.** ESI<sup>+</sup>-MS spectrum of ligand HL<sup>3</sup> in MeOH.

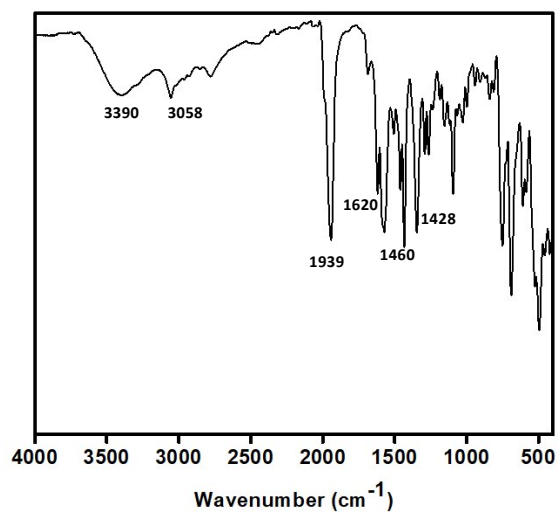

**Figure S16.** FTIR spectrum of complex 1.

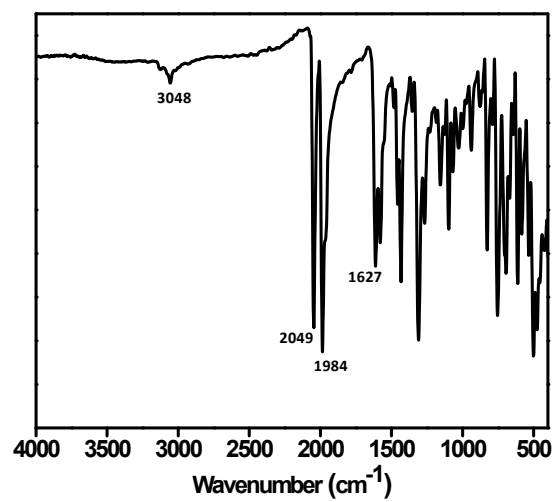

**Figure S17.** FTIR spectrum of complex 2.

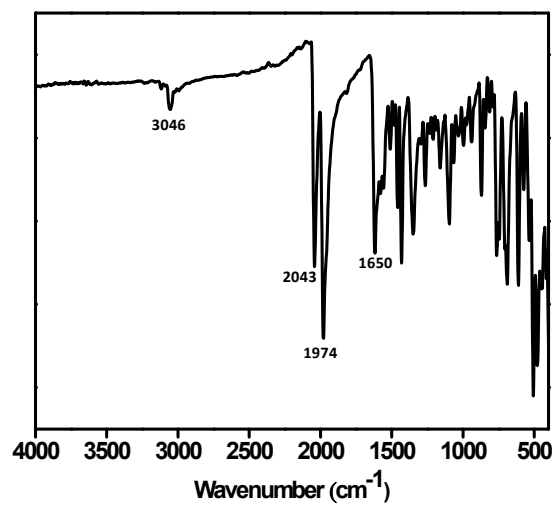

**Figure S18.** FTIR spectrum of complex 3.



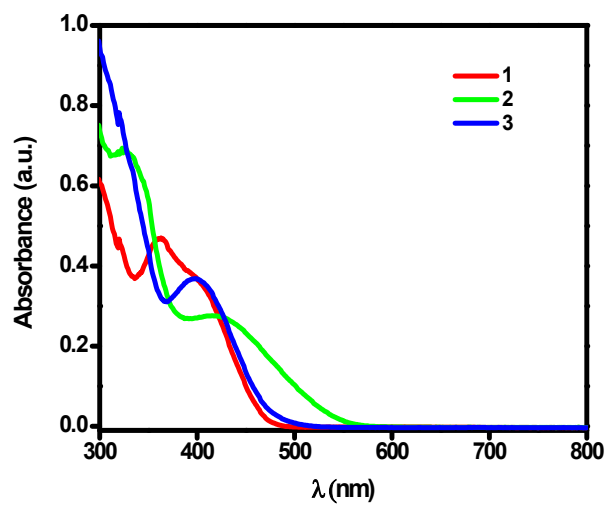

Figure S19. UV-Vis spectra of complexes 1-3 recorded in DMF.

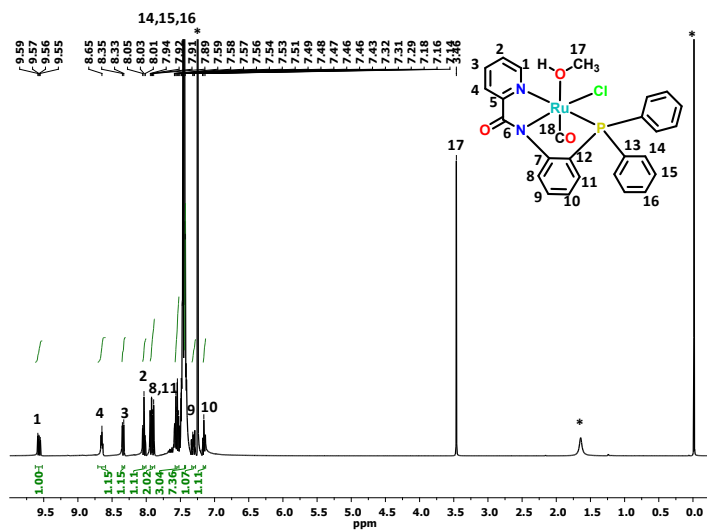

Figure S20.  $^1\text{H}$  NMR spectrum of complex 1 in  $\text{CDCl}_3$ . \* Represents residual solvent peak.

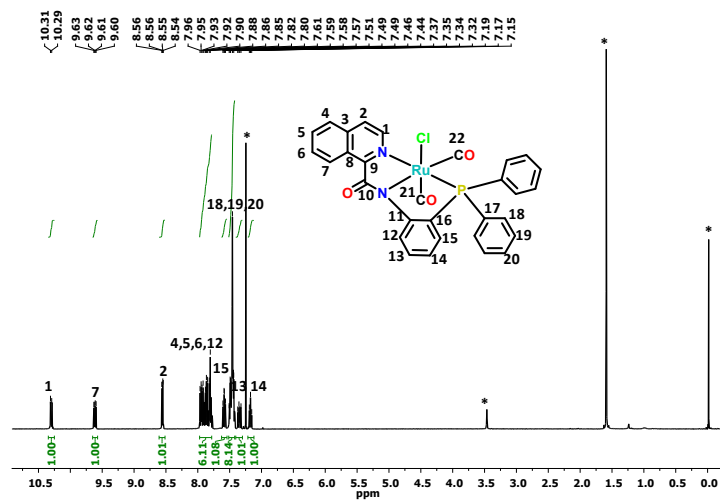

**Figure S21.** <sup>1</sup>H NMR spectrum of complex **2** in CDCl<sub>3</sub>. \* Represents residual solvent peak.

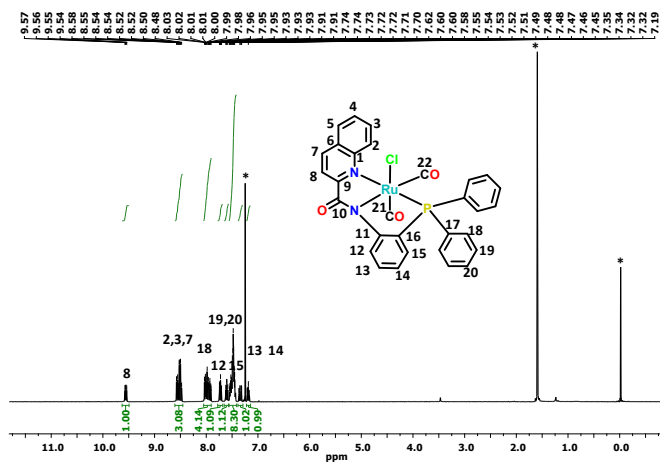

**Figure S22.** <sup>1</sup>H NMR spectrum of complex **3** in CDCl<sub>3</sub>. \* Represents residual solvent peak.

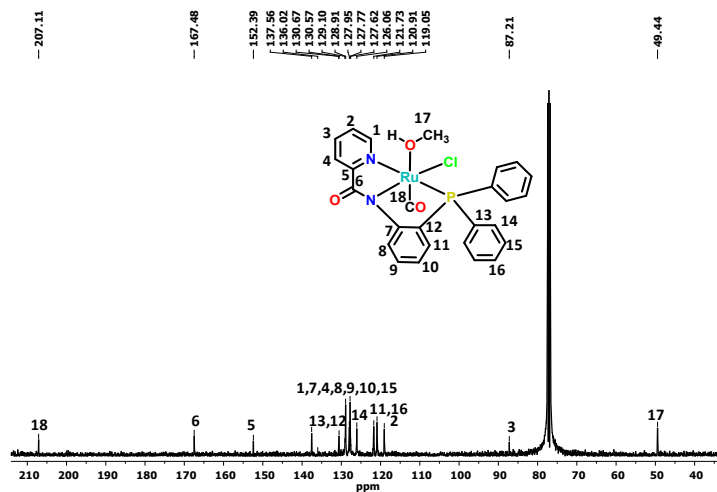

**Figure S23.** Selected part of  $^{13}\text{C}$  NMR spectrum of complex **1** in  $\text{CDCl}_3$ . \* Represents residual solvent peak.

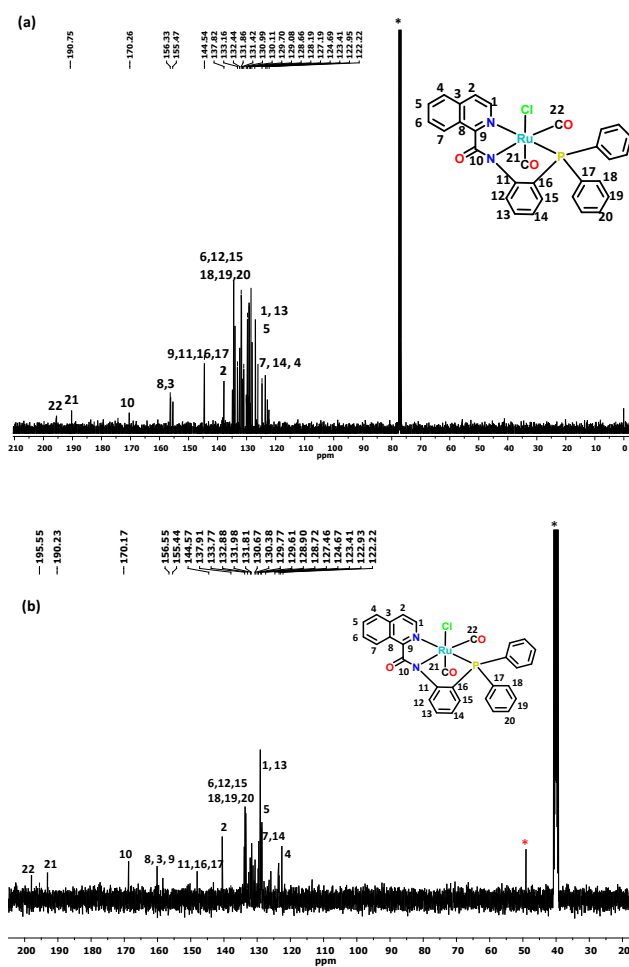

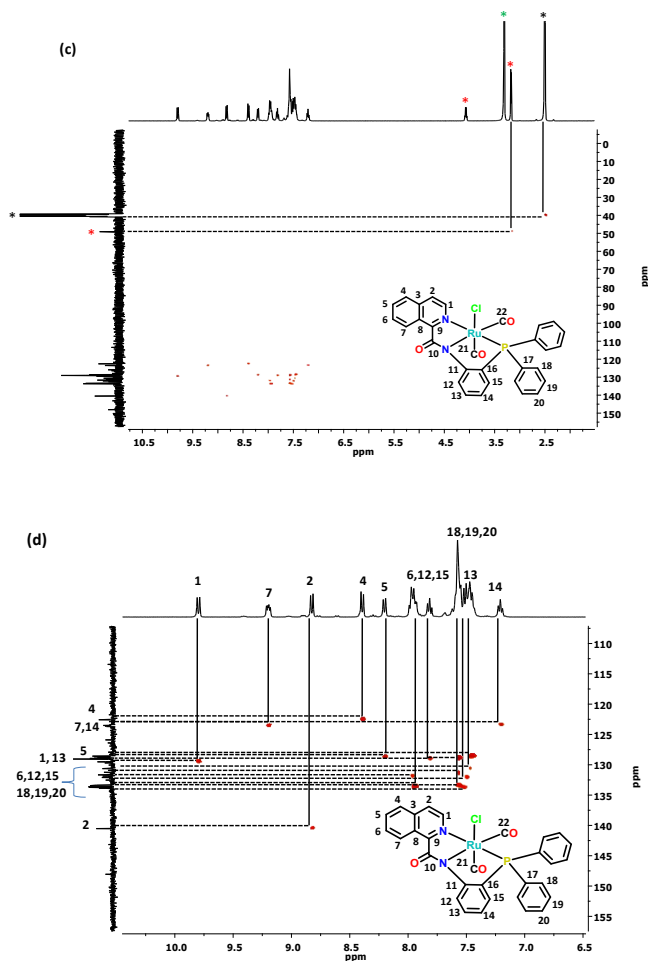

**Figure S24.** (a) Selected part of <sup>13</sup>C NMR spectrum of complex **2** in CDCl<sub>3</sub>. (b) <sup>13</sup>C NMR spectrum of complex **2** in DMSO-d<sub>6</sub>. (c) HSQC spectrum of complex **2** in DMSO-d<sub>6</sub>. (d) Expansion of HSQC signals in the range of 6.6 to 10.0 ppm for <sup>1</sup>H NMR spectrum and 120-155 ppm for <sup>13</sup>C NMR spectrum. Black, red and green asterisks represent the NMR solvent and residual solvents methanol and adventitious H<sub>2</sub>O, respectively.

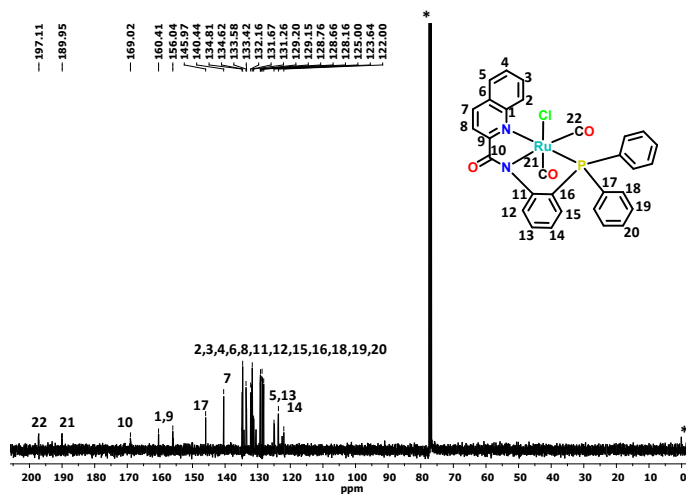

**Figure S25.** Selected part of  $^{13}\text{C}$  NMR spectrum of complex **3** in  $\text{CDCl}_3$ . \* Represents residual solvent peak.

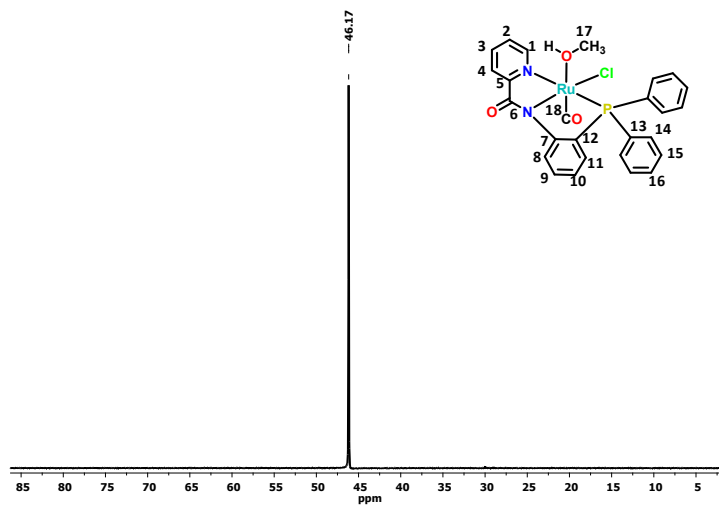

**Figure S26.** Selected part of  $^{31}\text{P}$  NMR spectrum of complex **1** in  $\text{CDCl}_3$ .

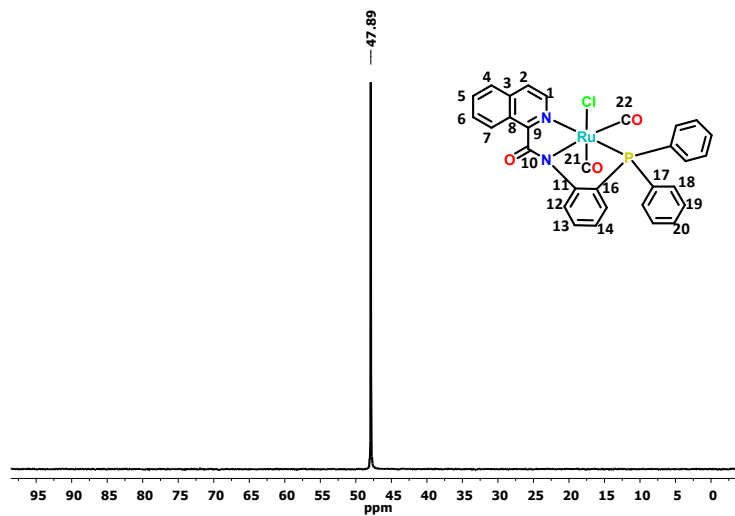

**Figure S27.** Selected part of  $^{31}\text{P}$  NMR spectrum of complex **2** in  $\text{CDCl}_3$ .

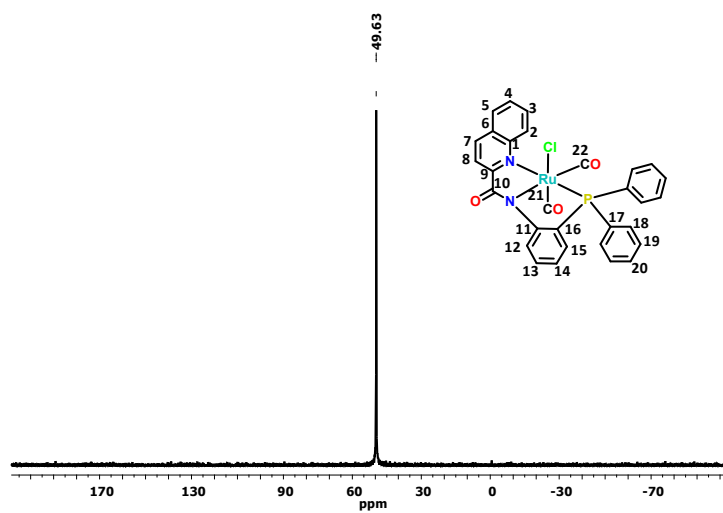

**Figure S28.** Selected part of  $^{31}\text{P}$  NMR spectrum of complex **3** in  $\text{CDCl}_3$ .

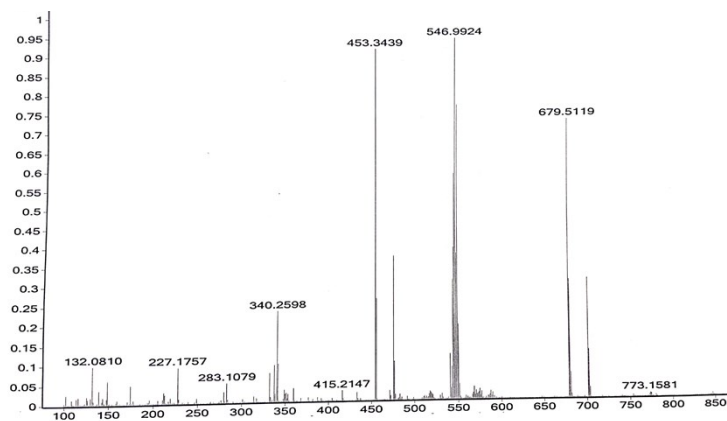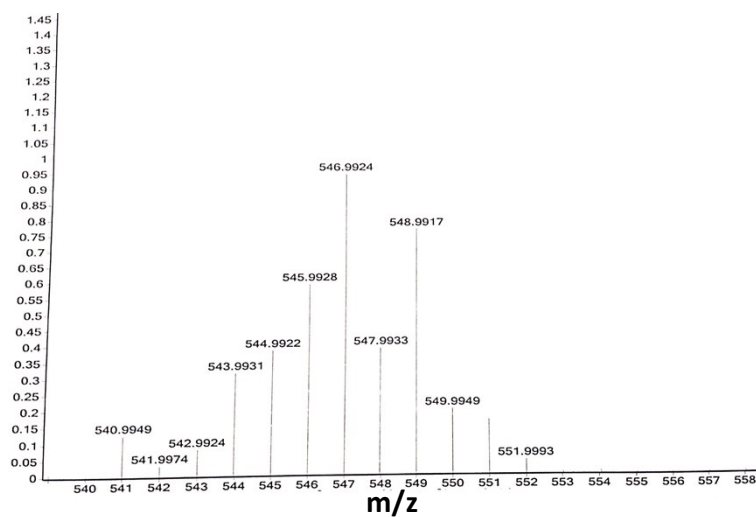

**Figure S29.** ESI<sup>+</sup>-MS spectrum of complex 1 in MeOH.

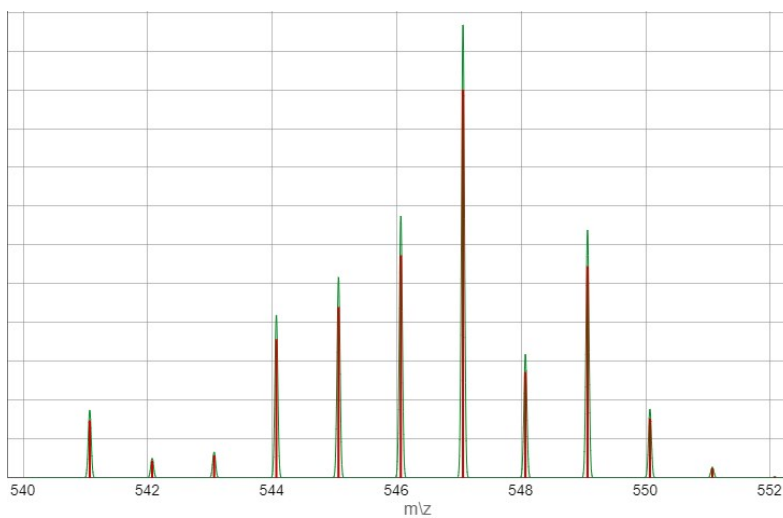

**Figure S30.** Experimental (green) and simulated (red) pattern for molecular ion peak at *m/z* = 547.0647 [M-CH<sub>3</sub>OH]+H]<sup>+</sup> for complex 1.

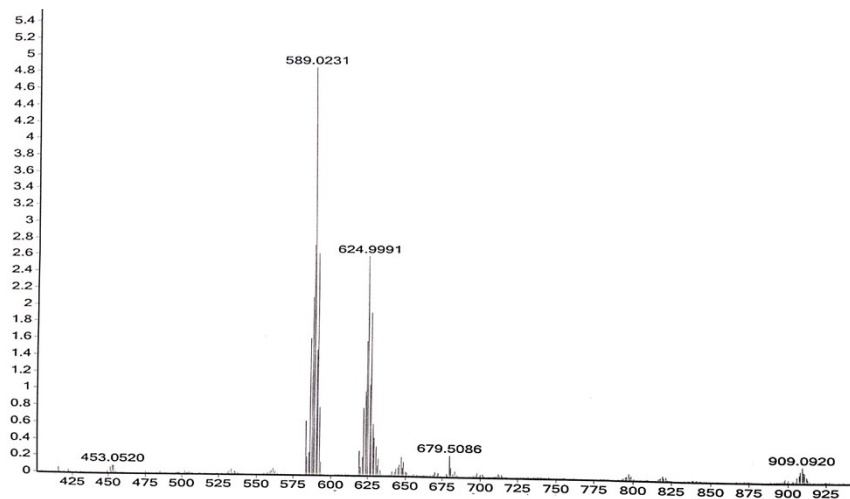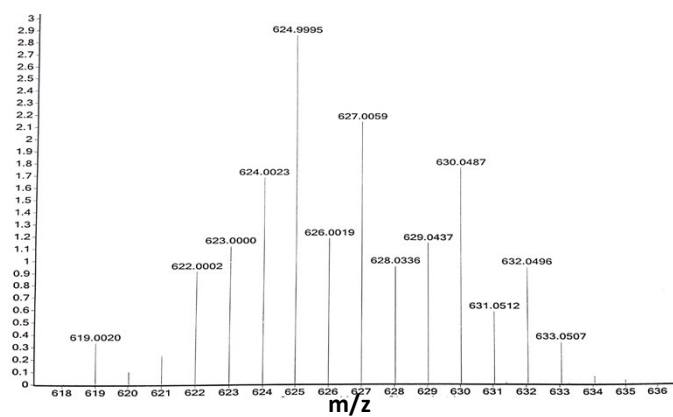

**Figure S31.** ESI<sup>+</sup>-MS spectrum of complex **2** in MeOH.

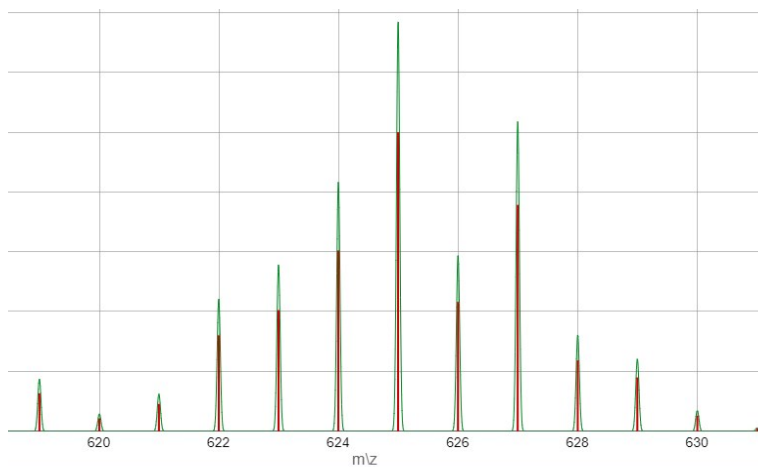

**Figure S32.** Experimental (green) and simulated (red) pattern for molecular ion peak at  $m/z = 625.002$  [M+H]<sup>+</sup> for complex **2**.



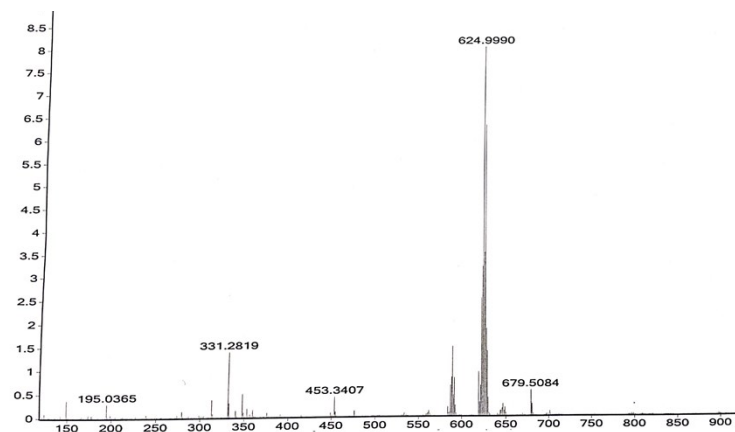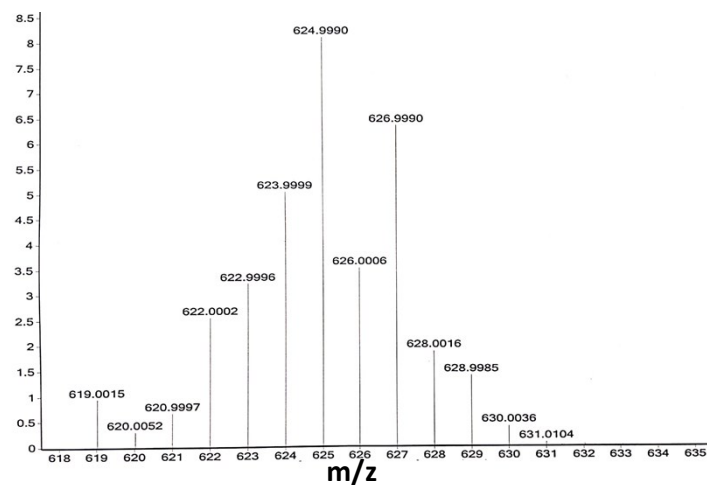

**Figure S33.** ESI<sup>+</sup>-MS spectrum of complex 3.

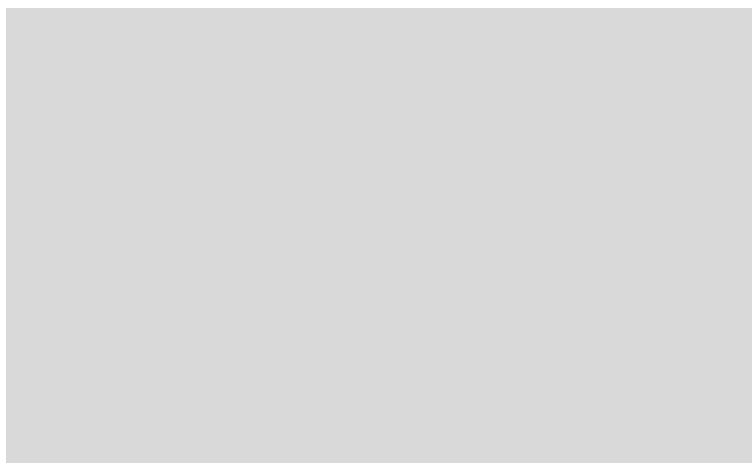

**Figure S34.** Experimental (green) and simulated (red) pattern for molecular ion peak at *m/z* = 625.0021 [M+H]<sup>+</sup> for complex 3.

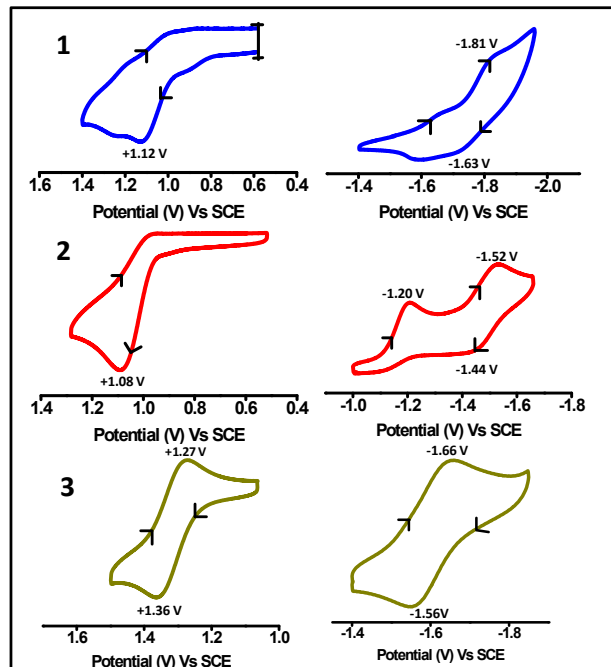

**Figure S35.** Cyclic voltammograms of complexes **1–3**. Conditions: Solvent, CH<sub>3</sub>OH; complex, ca. 1 mM; supporting electrolyte, TBAP, ca. 100 mM; working electrode, glassy carbon; reference electrode, Ag/Ag<sup>+</sup>; auxiliary electrode, Pt wire; scan rate, 100 mV/s.

#### Gas chromatograms for various organic products with the method used:

**Method A:** Column information: Elite-5, L=30 m, ID: 0.25 mm; injector temperature: 50°C; column flow rate: 1.13 mL/min; column temperature: 50-180 °C; temperature program: 10 °C/min; detector temperature: 250 °C

**Method B:** Column information: Elite-5, L=30 m, ID: 0.25 mm; injector temperature: 100°C; column flow rate: 1.13 mL/min; column temperature: 80-180 °C; temperature program: 8 °C/min; detector temperature: 270 °C

**Method C:** Column information: Rtx-5, L = 30 m, ID: 0.25 mm; injector temperature: 220 °C; column flow rate: 1.13 mL/min; column temperature: 100 – 180 °C; temperature program: 6 °C/min; detector temperature: 250 °C.

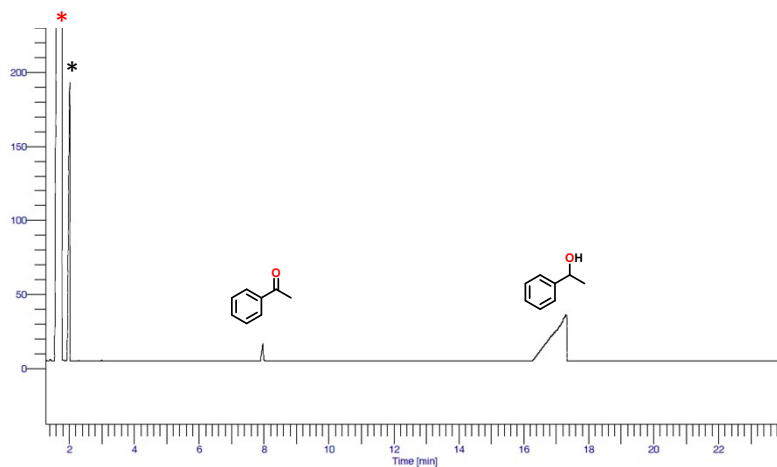

**Figure S36.** Gas chromatogram for the transfer hydrogenation of acetophenone (Table 2, Entry 1) using method A. \* Represents ethyl acetate and \* represents isopropanol.

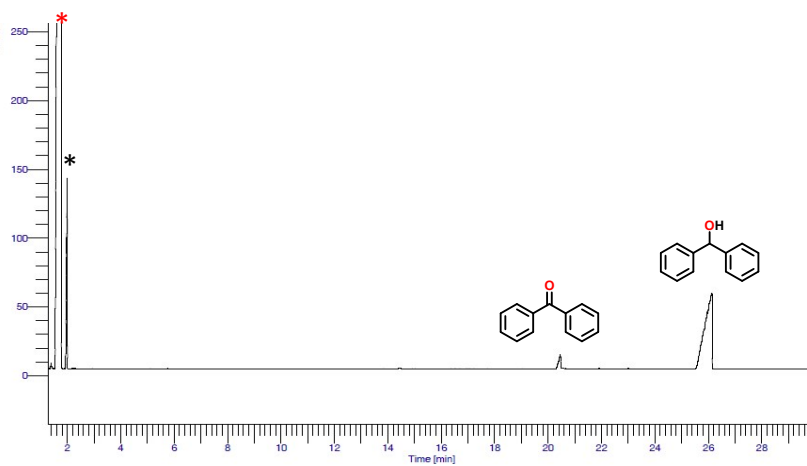

**Figure S37.** Gas chromatogram for the transfer hydrogenation of benzophenone, Table 2, Entry 2 using method A. \* Represents ethyl acetate and \* represents isopropanol.

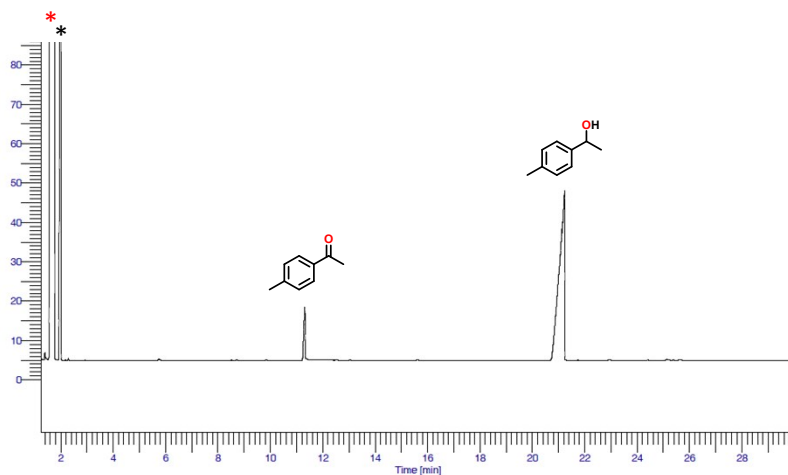

**Figure S38.** Gas chromatogram for the transfer hydrogenation of 4-methylacetophenone, Table 2, Entry 3 using method A. \* Represents ethyl acetate and \* represents isopropanol.

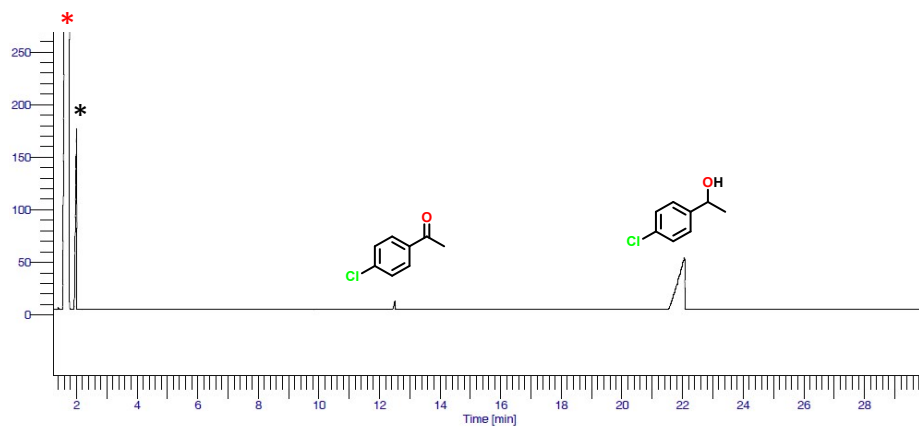

**Figure S39.** Gas chromatogram for the transfer hydrogenation of 4-chloroacetophenone, Table 2, Entry 4 using method A. \* Represents ethyl acetate and \* represents isopropanol.

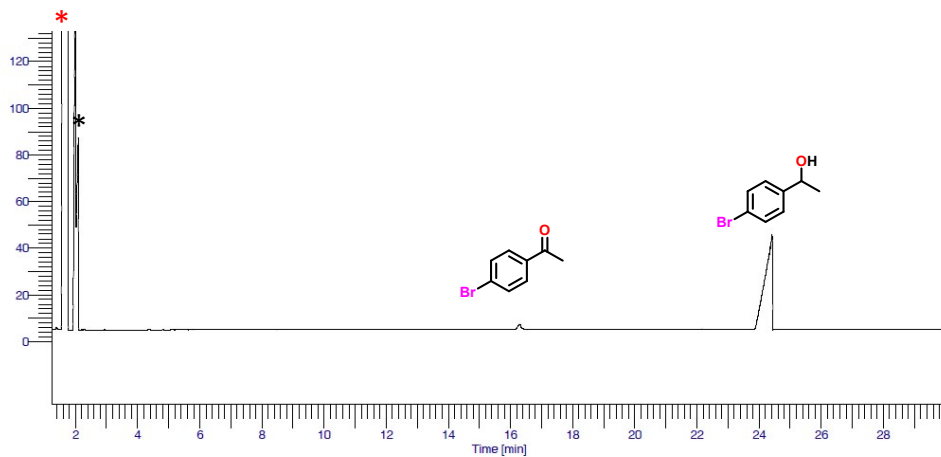

**Figure S40.** Gas chromatogram for the transfer hydrogenation of 4-bromoacetophenone, Table 2, Entry 5 using method A. \* Represents ethyl acetate and \* represents isopropanol.

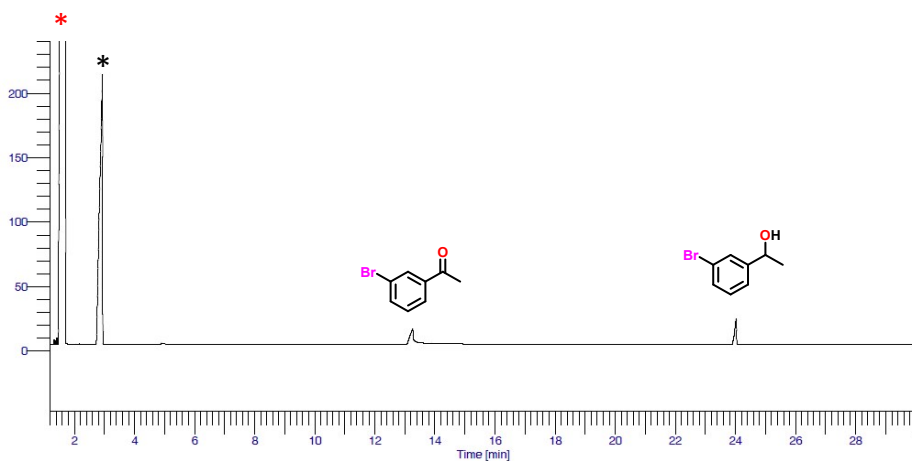

**Figure S41.** Gas chromatogram for the transfer hydrogenation of 3-bromoacetophenone, Table 2, Entry 6 using method B. \* Represents ethyl acetate and \* represents isopropanol.

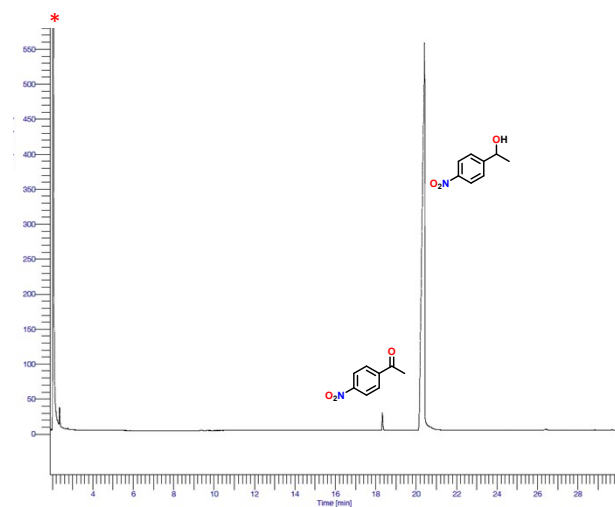

**Figure S42.** Gas chromatogram for the transfer hydrogenation of 4-nitroacetophenone, Table 2, Entry 7 using method A. \* Represents ethyl acetate.

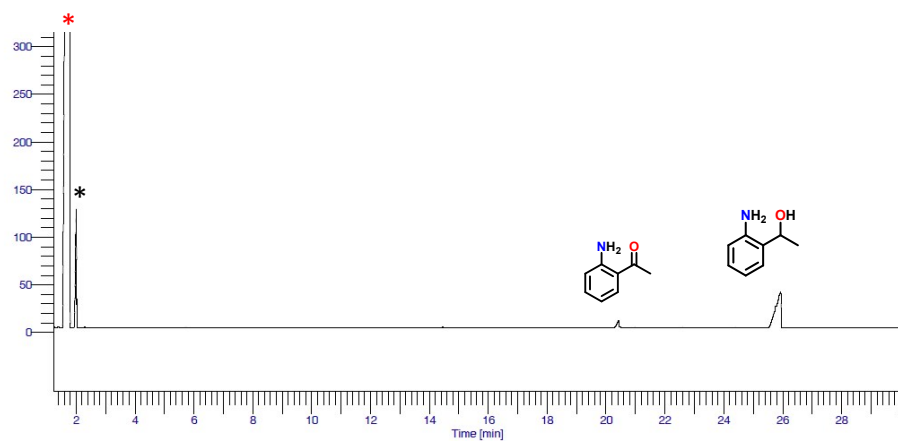

**Figure S43.** Gas chromatogram for the transfer hydrogenation of 2-aminoacetophenone, Table 2, Entry 8 using method A. \* Represents ethyl acetate and \* represents isopropanol.

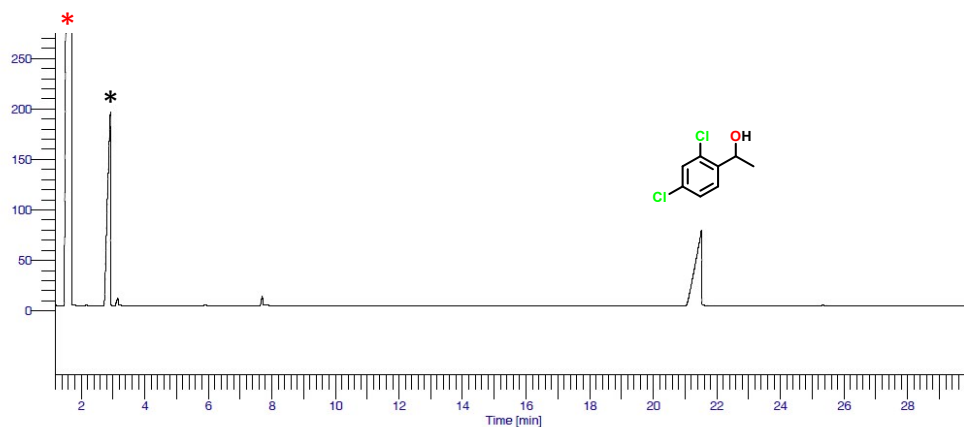

**Figure S44.** Gas chromatogram for the transfer hydrogenation of 2,4-dichloroacetophenone, Table 2, Entry 9 using method B. \* Represents ethyl acetate and \* represents isopropanol.

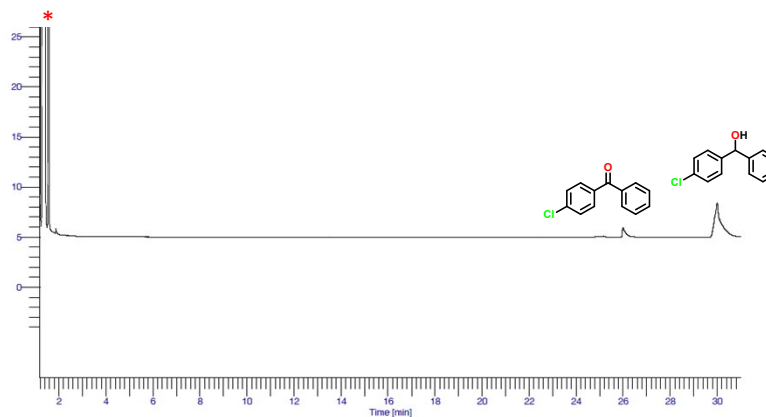

**Figure S45.** Gas chromatogram for the transfer hydrogenation of 4-chlorobenzophenone, Table 2, Entry 10 using method A. \* Represents ethyl acetate.

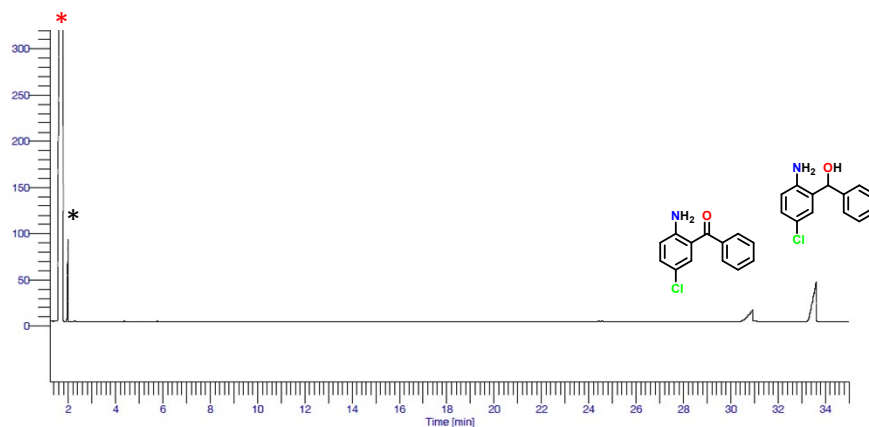

**Figure S46.** Gas chromatogram for the transfer hydrogenation of 2-amino-4-chlorobenzophenone, Table 2, Entry 11 using method A. \* Represents ethyl acetate and \* represents isopropanol.

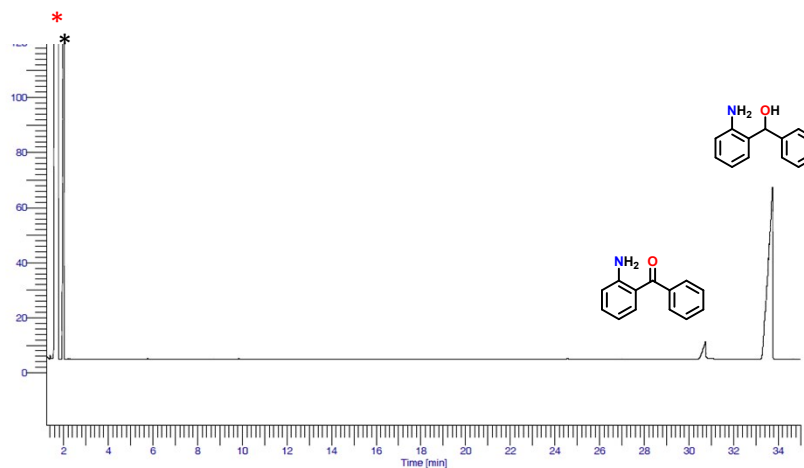

**Figure S47.** Gas chromatogram for the transfer hydrogenation of 2-aminobenzophenone, Table 2, Entry 12 using method A. \* Represents ethyl acetate and \* represents isopropanol.



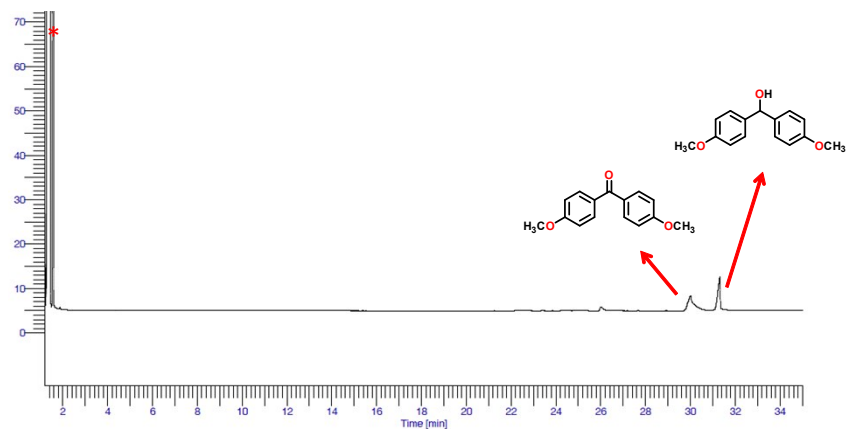

**Figure S48.** Gas chromatogram for the transfer hydrogenation of 4,4'-dimethoxybenzophenone, Table 2, Entry 13 using method B. \* Represents ethyl acetate.

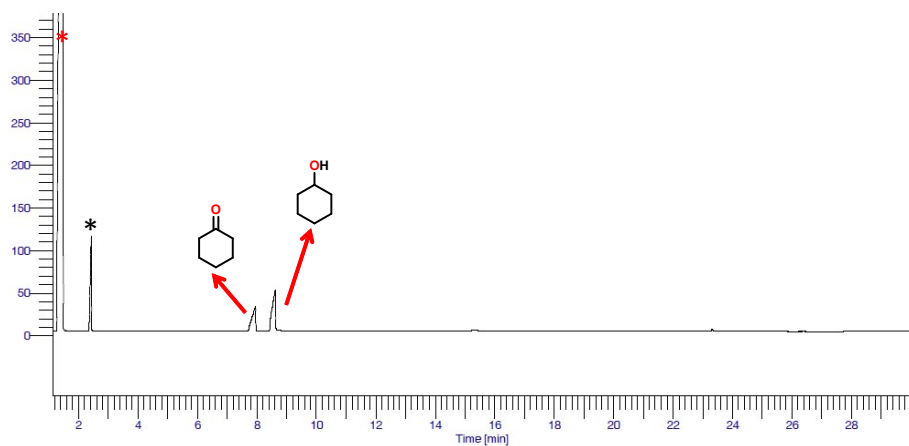

**Figure S49.** Gas chromatogram for the transfer hydrogenation of cyclohexanone, Table 2, Entry 14 using method B. \* Represents ethyl acetate and \* represents isopropanol.

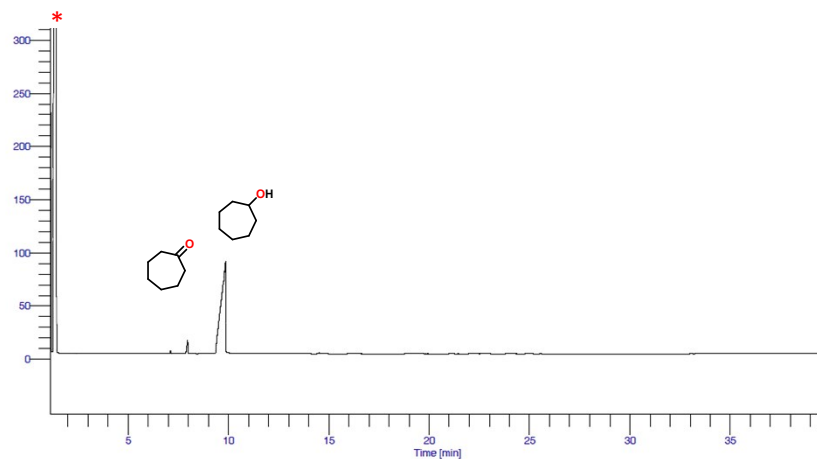

**Figure S50.** Gas chromatogram for the transfer hydrogenation of cycloheptanone, Table 2, Entry 15 using method A. \* Represents ethyl acetate.

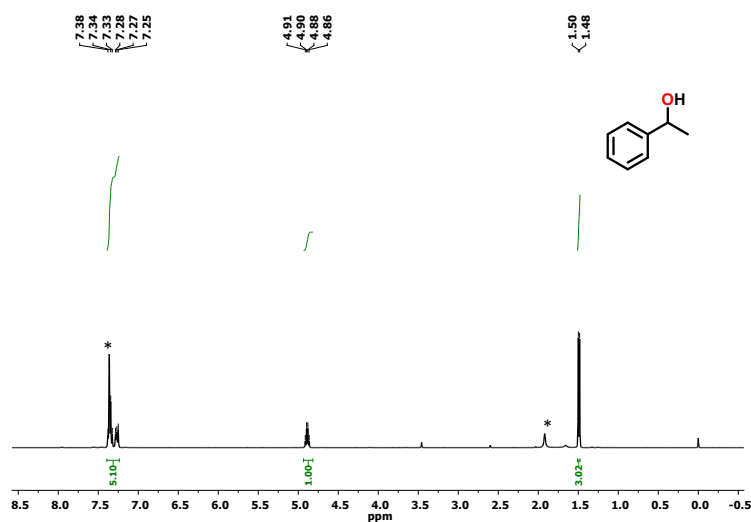

**Figure S51.**  $^1\text{H}$  NMR spectrum of product **1** in  $\text{CDCl}_3$ . \* Represents the residual solvent peak and/or water.

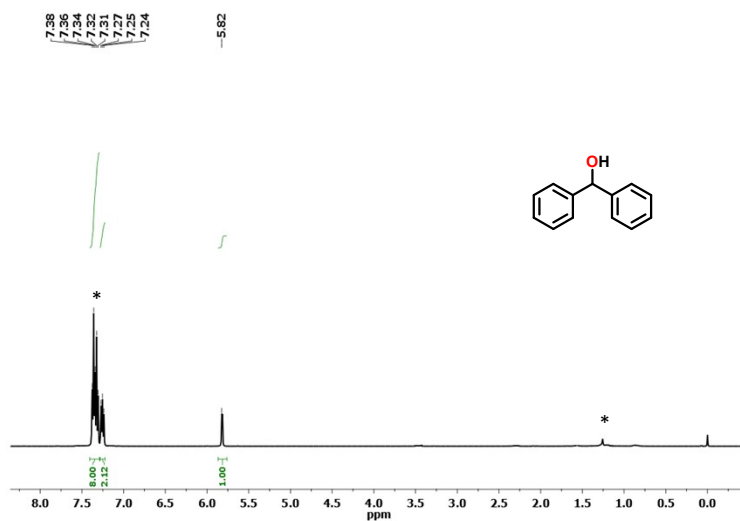

**Figure S52.**  $^1\text{H}$  NMR spectrum of product **2** in  $\text{CDCl}_3$ . \* Represents the residual solvent peak and/or water.

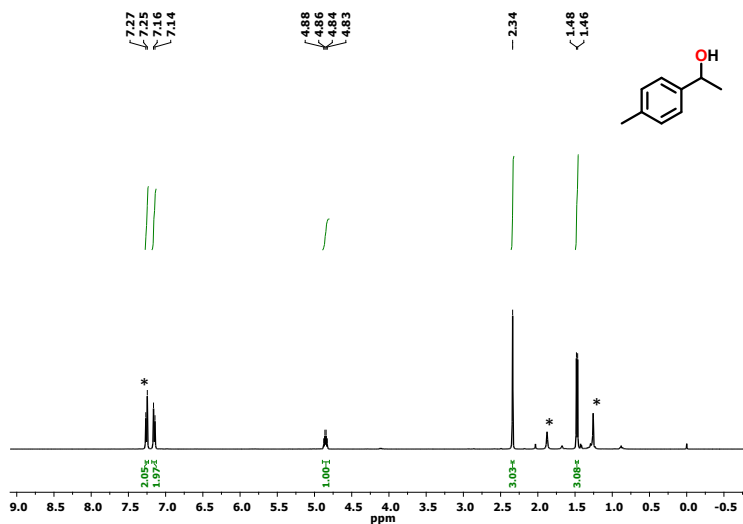

**Figure S53.**  $^1\text{H}$  NMR spectrum of product **3** in  $\text{CDCl}_3$ . \* Represents the residual solvent peak and/or water.

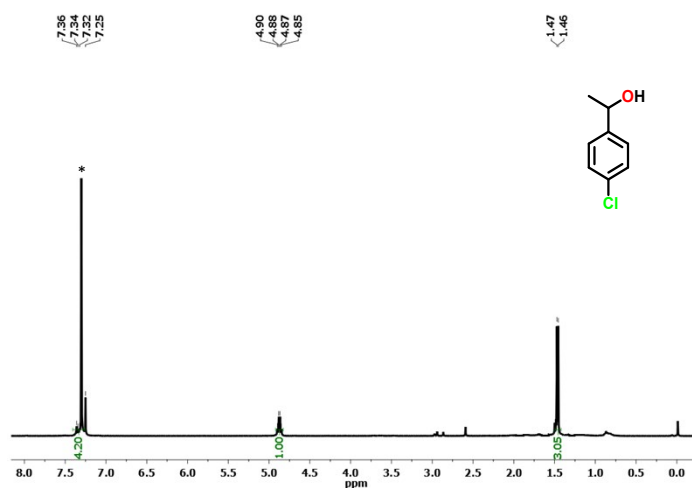

**Figure S54.**  $^1\text{H}$  NMR spectrum of product **4** in  $\text{CDCl}_3$ . \* Represents the residual solvent peak.

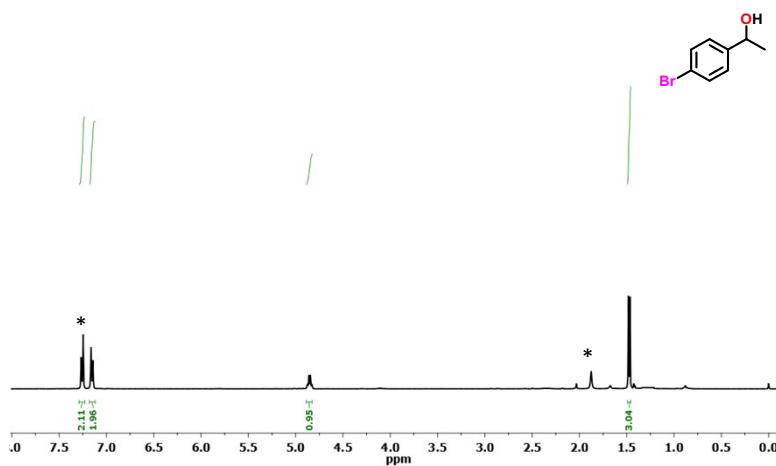

**Figure S55.**  $^1\text{H}$  NMR spectrum of product **5** in  $\text{CDCl}_3$ . \* Represents the residual solvent peak and/or water.

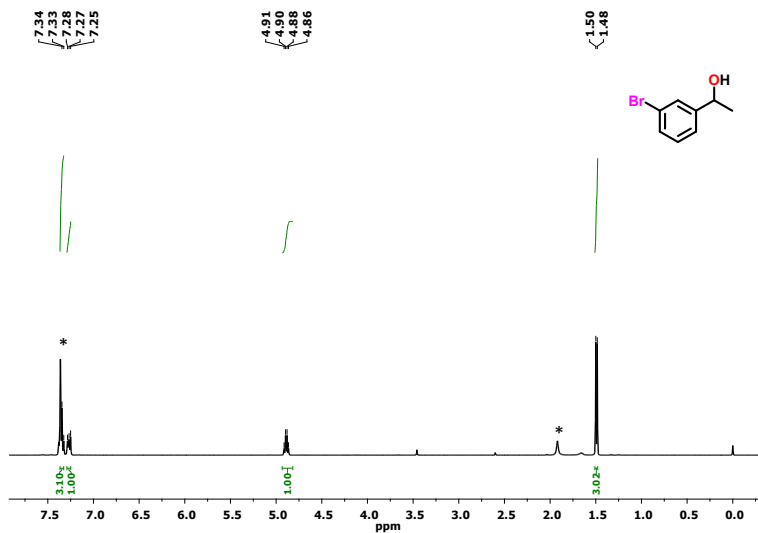

**Figure S56.**  $^1\text{H}$  NMR spectrum of product **6** in  $\text{CDCl}_3$ . \* Represents the residual solvent peak and/or water.

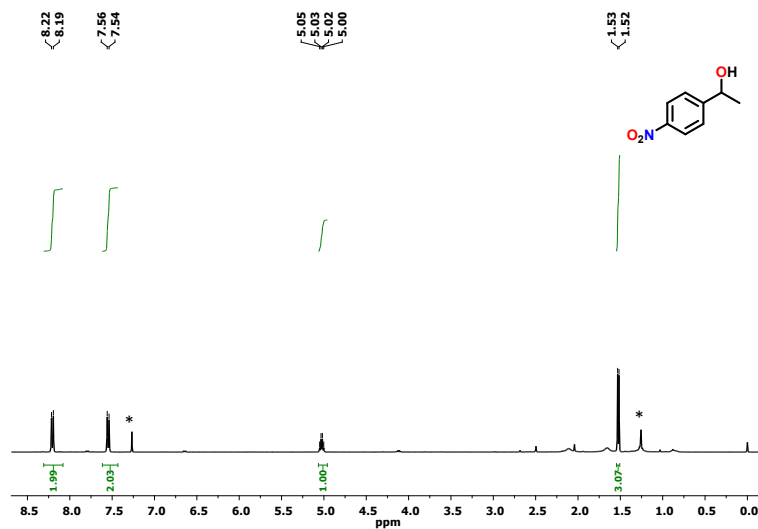

**Figure S57.**  $^1\text{H}$  NMR spectrum of product **7** in  $\text{CDCl}_3$ . \* Represents the residual solvent peak and/or water.

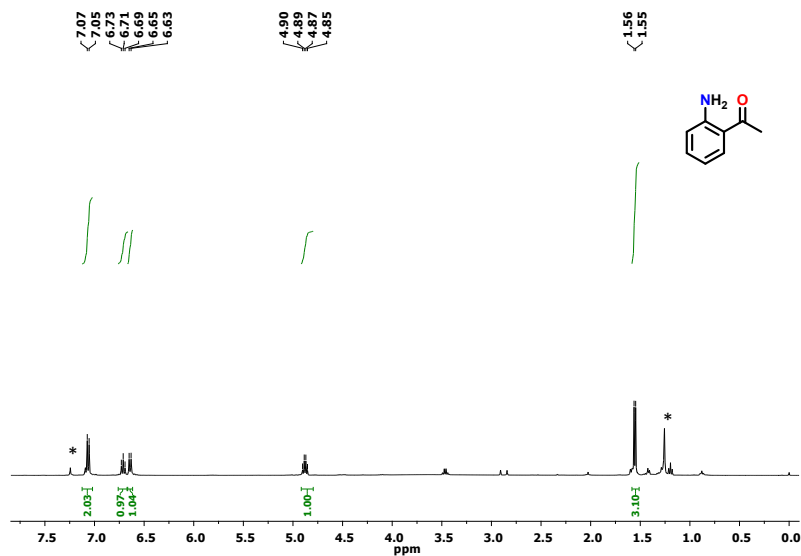

**Figure S58.** <sup>1</sup>H NMR spectrum of product **8** in CDCl<sub>3</sub>. \* Represents the residual solvent peak and/or water.

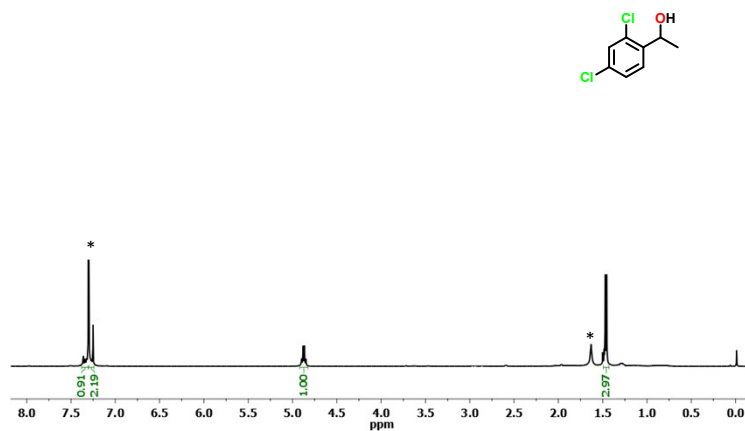

**Figure S59.** <sup>1</sup>H NMR spectrum of compound **9** in CDCl<sub>3</sub>. \* Represents the residual solvent peak and/or water.

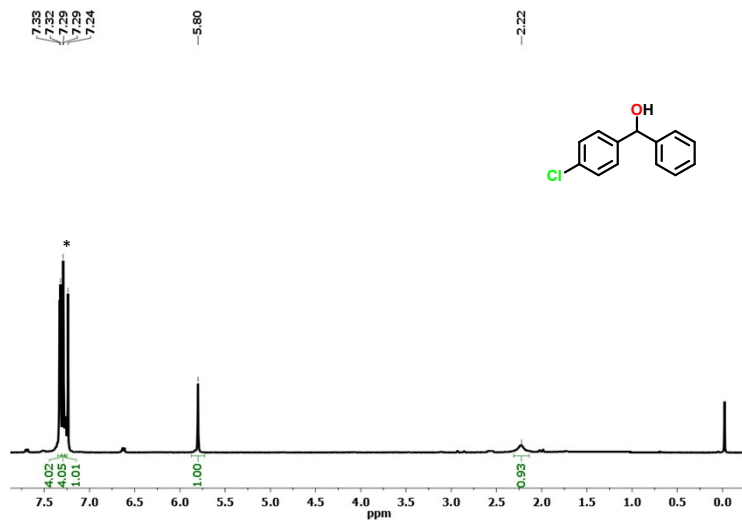

**Figure S60.** <sup>1</sup>H NMR spectrum of compound **10** in CDCl<sub>3</sub>. \* Represents the residual solvent peak and/or water.

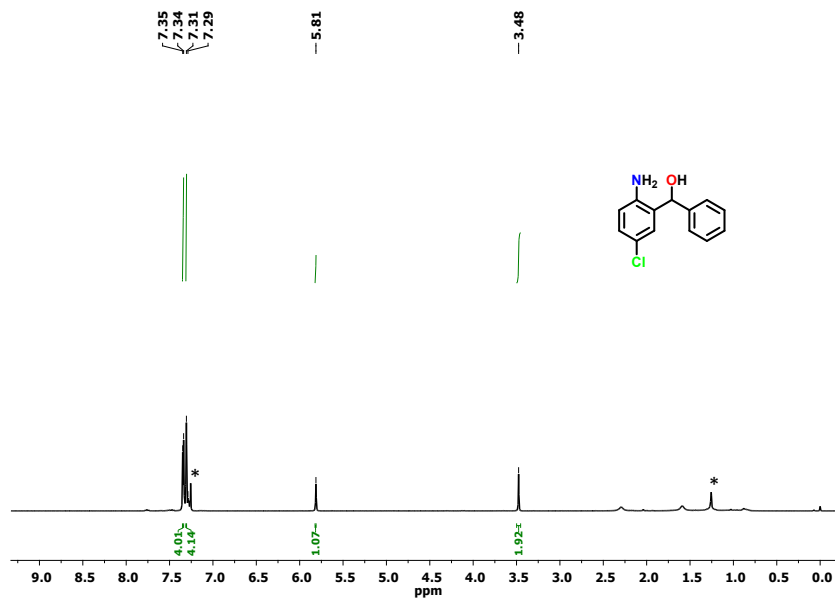

**Figure S61.** <sup>1</sup>H NMR spectrum of compound **11** in CDCl<sub>3</sub>. \* Represents the residual solvent peak and/or water.

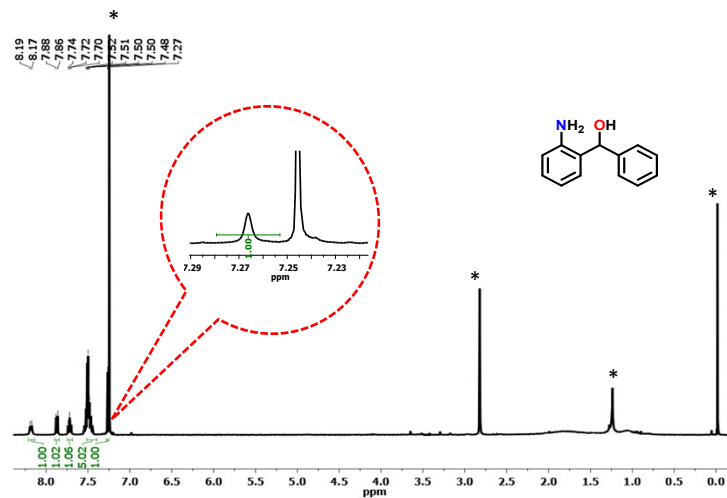

**Figure S62.**  $^1\text{H}$  NMR spectrum of compound **12** in  $\text{CDCl}_3$ . \* Represents the residual solvent peak and/or water.

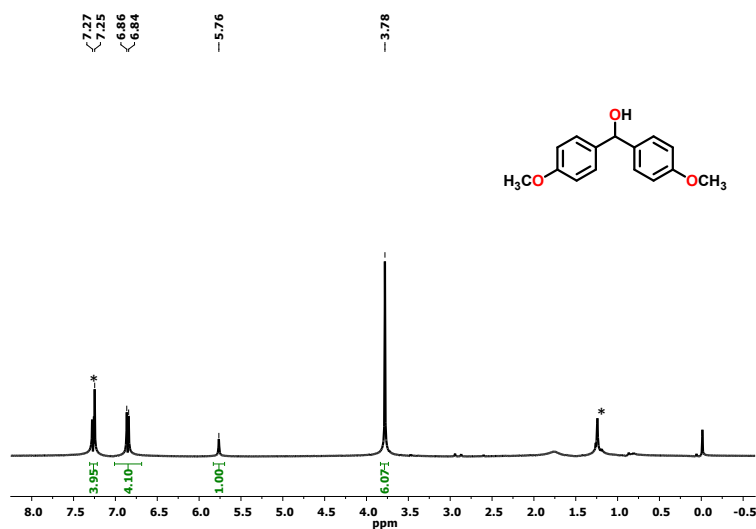

**Figure S63.**  $^1\text{H}$  NMR spectrum of compound **13** in  $\text{CDCl}_3$ . \* Represents the residual solvent peak and/or water.



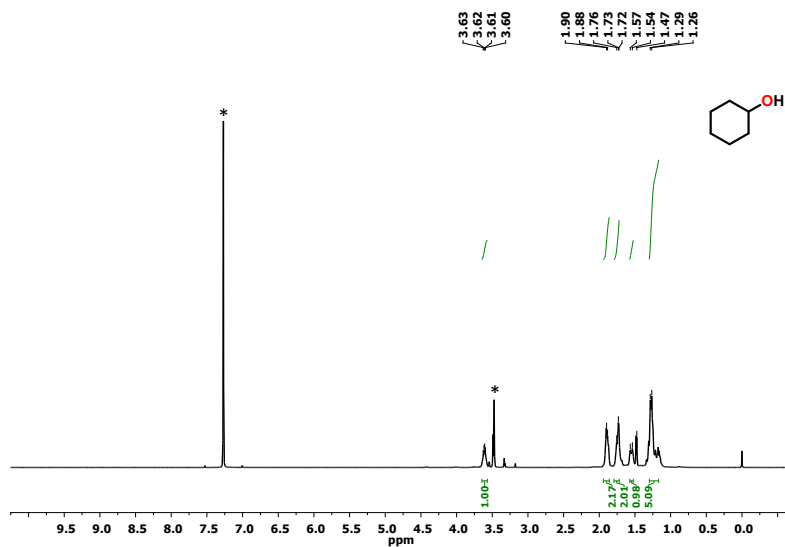

**Figure S64.**  $^1\text{H}$  NMR spectrum of product **14** in  $\text{CDCl}_3$ . \* Represents the residual solvent peak and/or water.

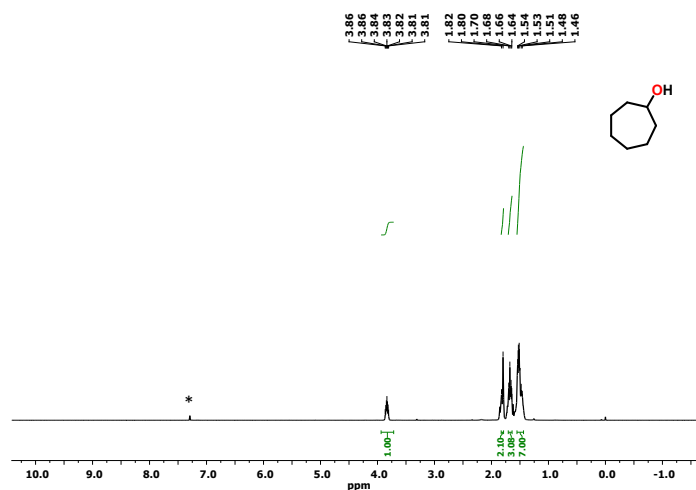

**Figure S65.**  $^1\text{H}$  NMR spectrum of product **15** in  $\text{CDCl}_3$ . \* Represents the residual solvent peak and/or water.

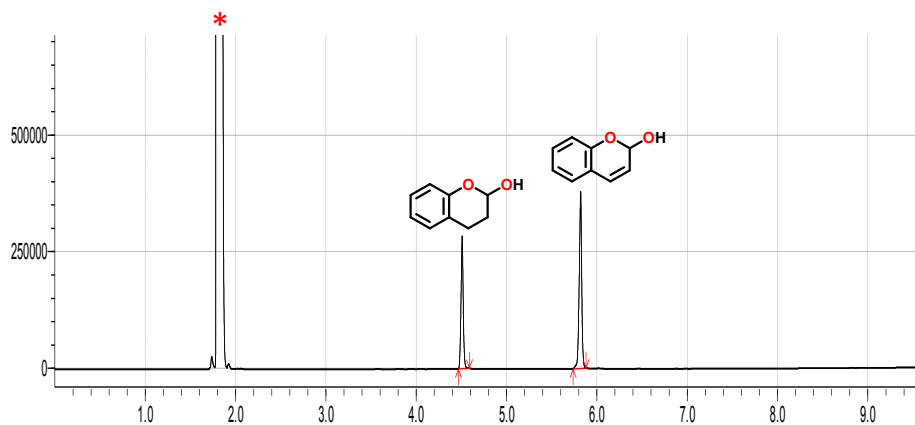

**Figure S66.** Gas chromatogram for the transfer hydrogenation of coumarin, Scheme 2, Entry 1 using method C. \* Represents ethyl acetate.

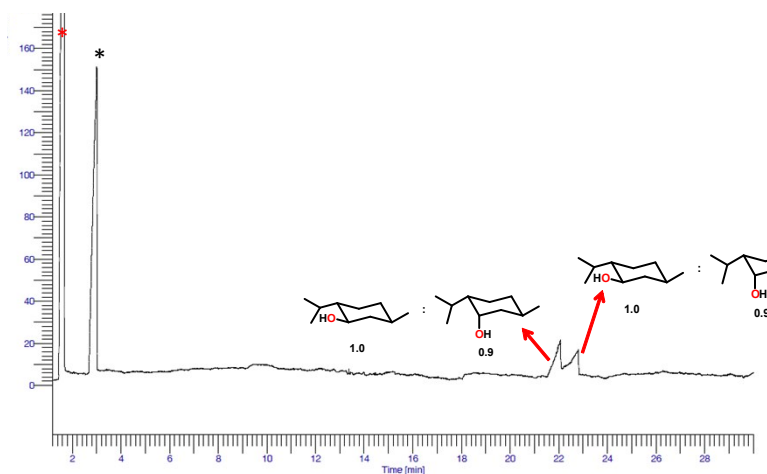

**Figure S67.** Gas chromatogram for the transfer hydrogenation of menthone, Scheme 2, Entry 2 using method B. \* Represents ethyl acetate and \* represents isopropanol.

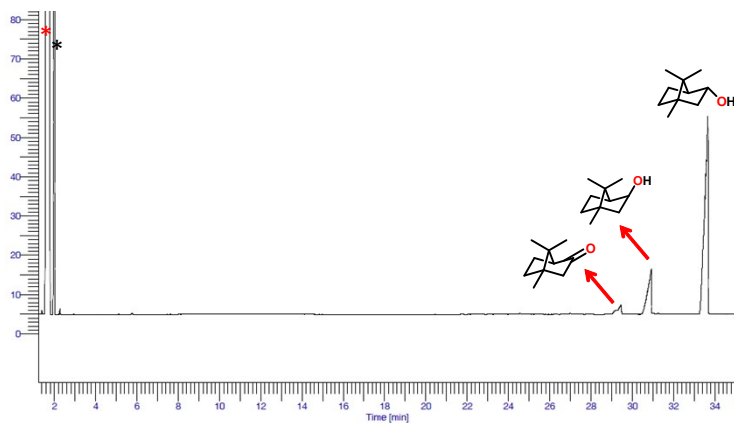

**Figure S68.** Gas chromatogram for the transfer hydrogenation of camphor, Scheme 2, Entry 3 using method B. \* Represents ethyl acetate and \* represents isopropanol.

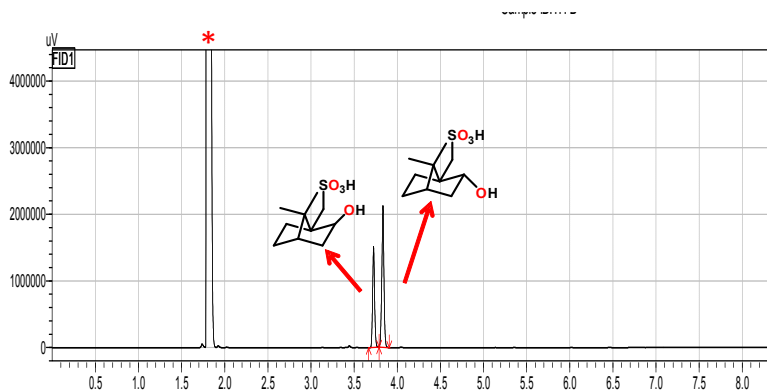

**Figure S69.** Gas chromatogram for the transfer hydrogenation of 10-camphorsulphonic acid, Scheme 2, Entry 4 using method C. \* Represents ethyl acetate.

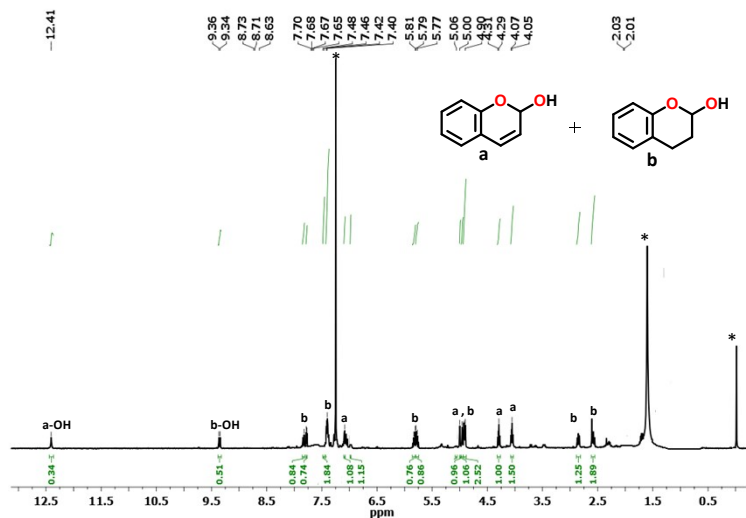

**Figure S70.**  $^1\text{H}$  NMR spectrum of TH products of coumarin in  $\text{CDCl}_3$ . \* Represents the residual solvent peak and/or water.

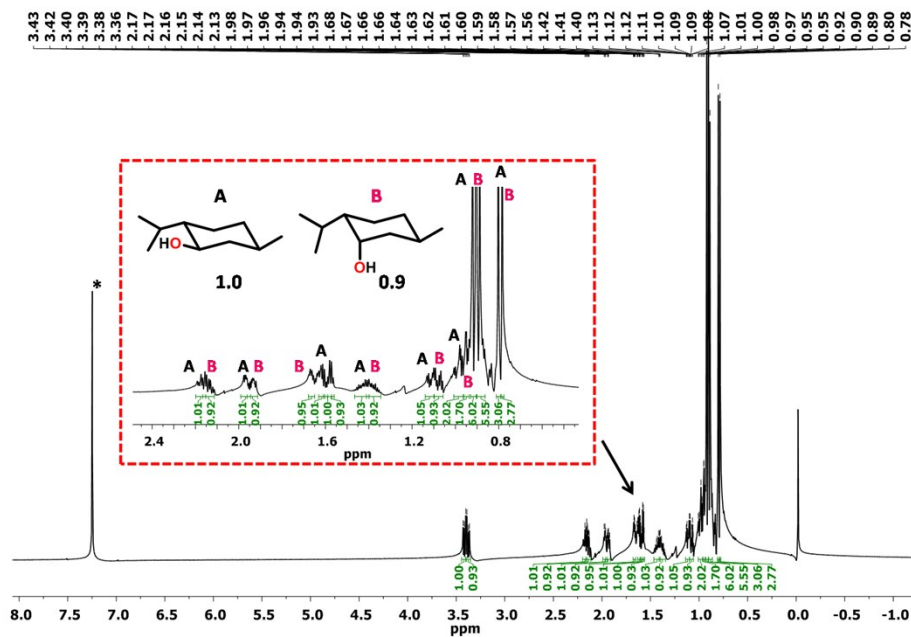

**Figure S71.**  $^1\text{H}$  NMR spectrum of diastereomers of menthone in  $\text{CDCl}_3$ . \* Represents the residual solvent peak.

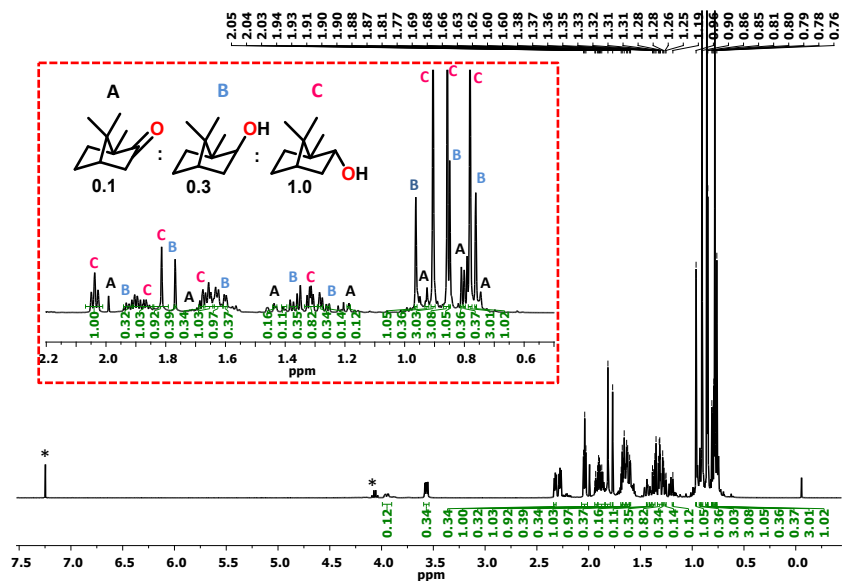

**Figure S72.**  $^1\text{H}$  NMR spectrum of diastereomers of camphor in  $\text{CDCl}_3$ . \* Represents the residual solvent peak.

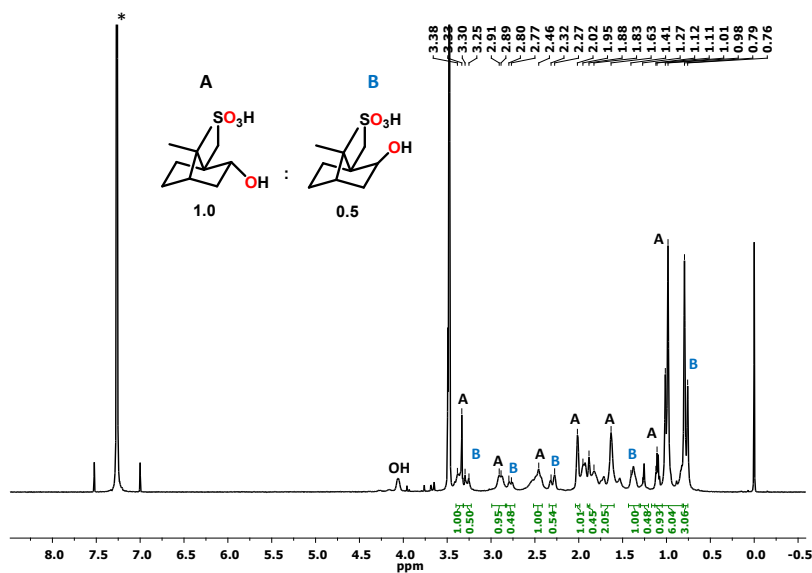

**Figure S73.**  $^1\text{H}$  NMR spectrum of diastereomers of 10-camphorsulphonic acid in  $\text{CDCl}_3$ . \* Represents the residual solvent peak.

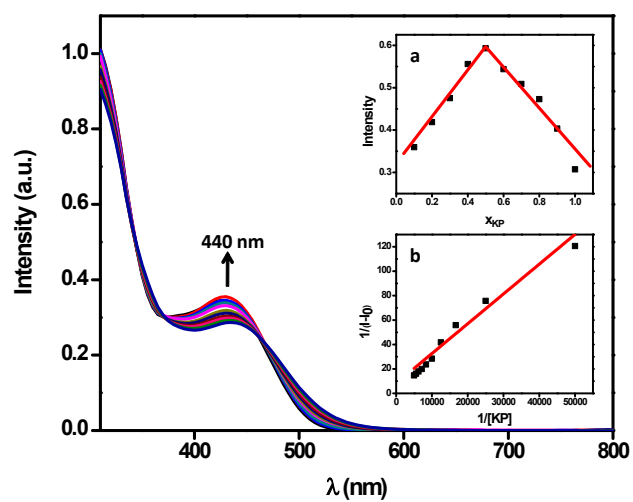

**Figure S74.** UV-Vis spectral titration of complex **3** (40  $\mu$ M) with potassium isopropoxide in DMF. Inset **a**: Job's plot showing a 1:1 binding stoichiometry between complex **3** and isopropoxide ion. Inset **b**: Linear regression fitting curve for a 1:1 binding between complex **3** and isopropoxide ion.

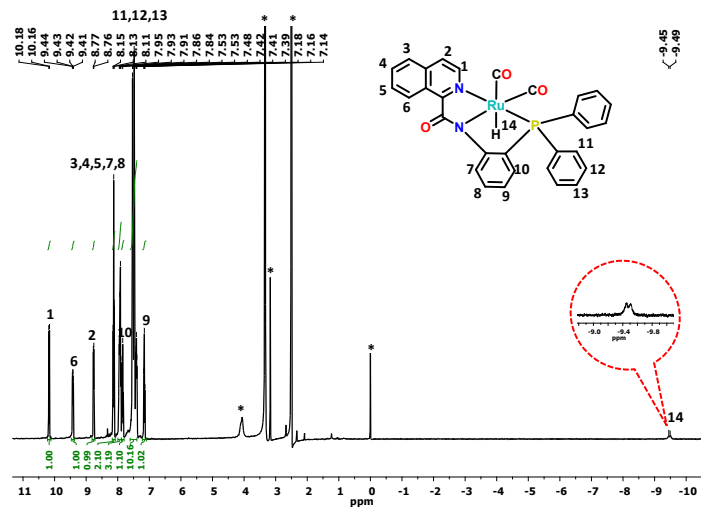

**Figure S75.**  $^1\text{H}$  NMR spectrum of complex **4** in  $\text{DMSO-d}_6$ . \* Represent residual solvent peaks.

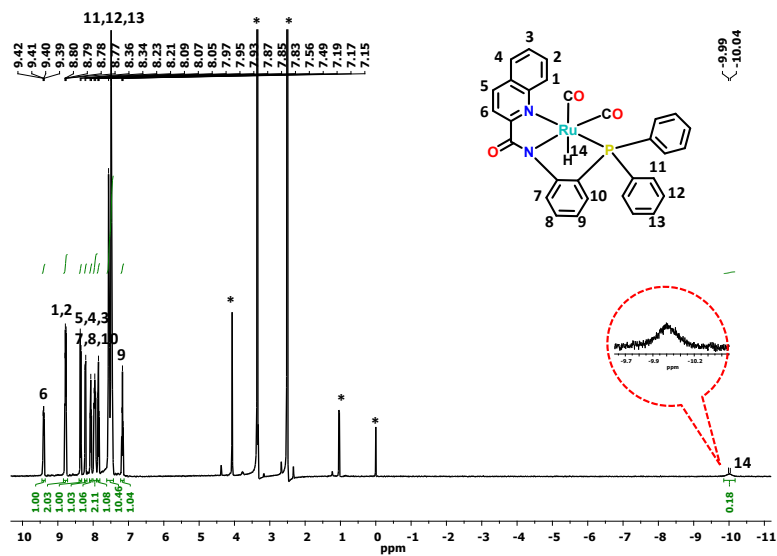

**Figure S76.**  $^1\text{H}$  NMR spectrum of complex **5** in  $\text{DMSO-d}_6$ . \* Represent residual solvent peaks.

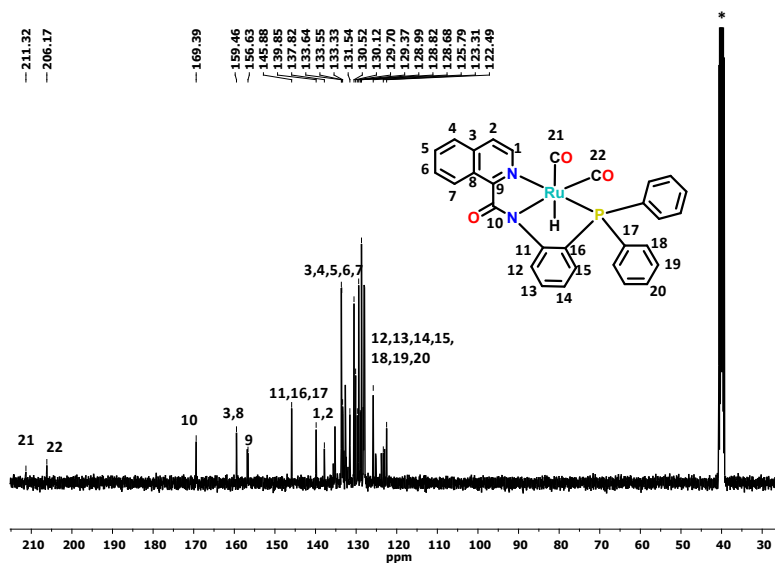

**Figure S77.** Selected part of  $^{13}\text{C}$  NMR spectrum of complex **4** in  $\text{DMSO-d}_6$ . \* Represents residual solvent peak.

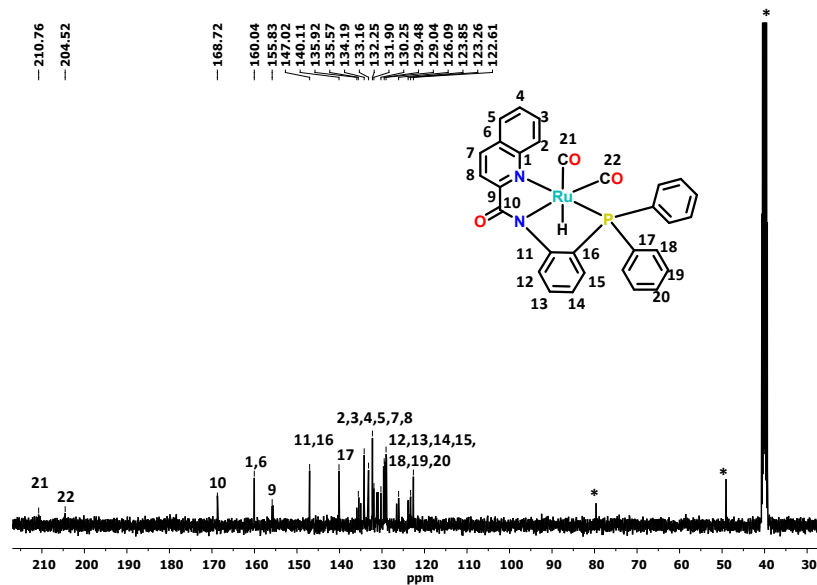

**Figure S78.** Selected part of  $^{13}\text{C}$  NMR spectrum of complex **5** in  $\text{DMSO-d}_6$ . \* Represents residual solvent peak.

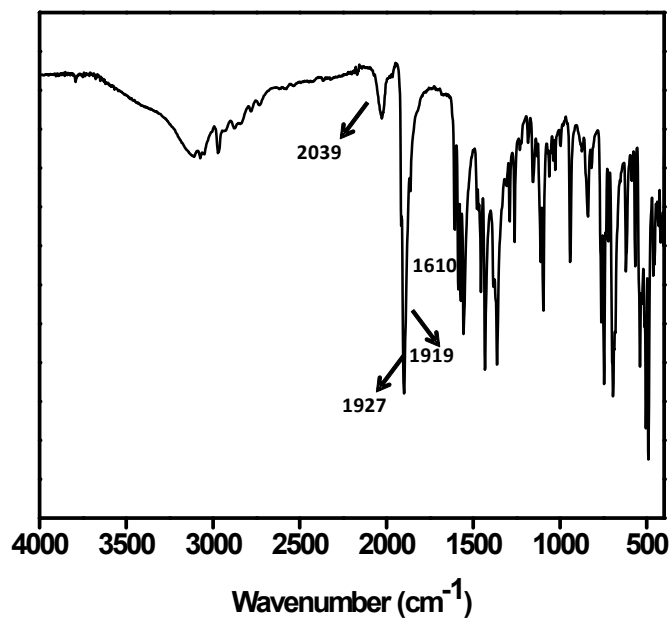

**Figure S79.** FTIR spectrum of complex **4**.



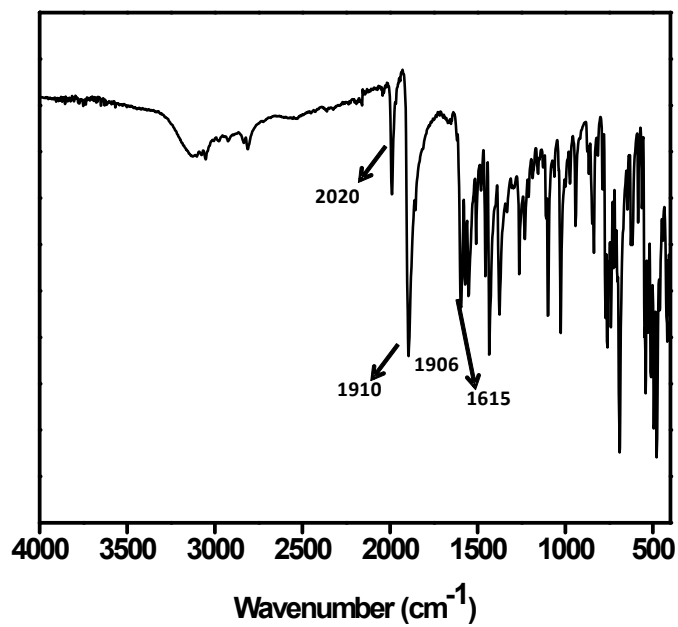

Figure S80. FTIR spectrum of complex 5.

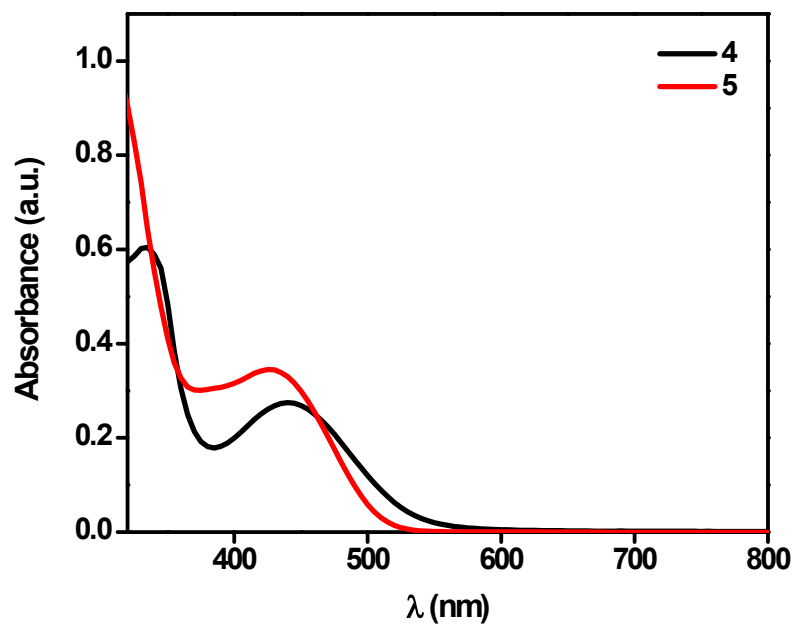

Figure S81. UV-Vis spectra of complexes 4 (black trace) and 5 (red trace) recorded in DMF.

$^1\text{H}$  NMR spectra used for the calculation of yields for the Hammett plot:

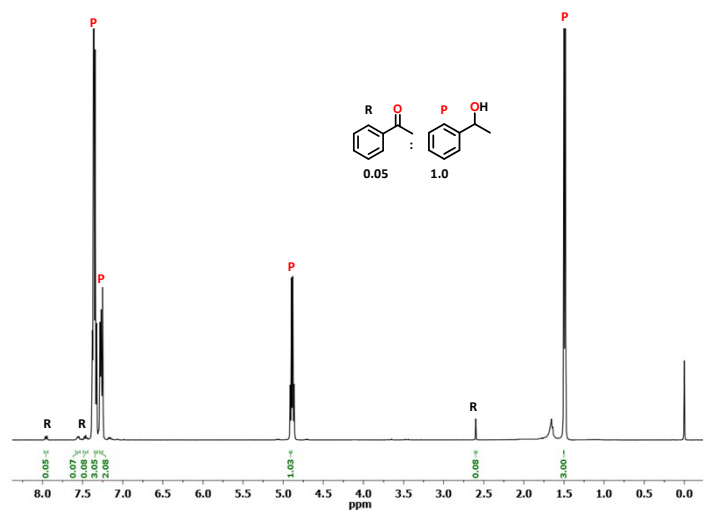

**Figure S82.**  $^1\text{H}$  NMR spectrum of a reaction mixture for the TH of acetophenone in  $\text{CDCl}_3$ .

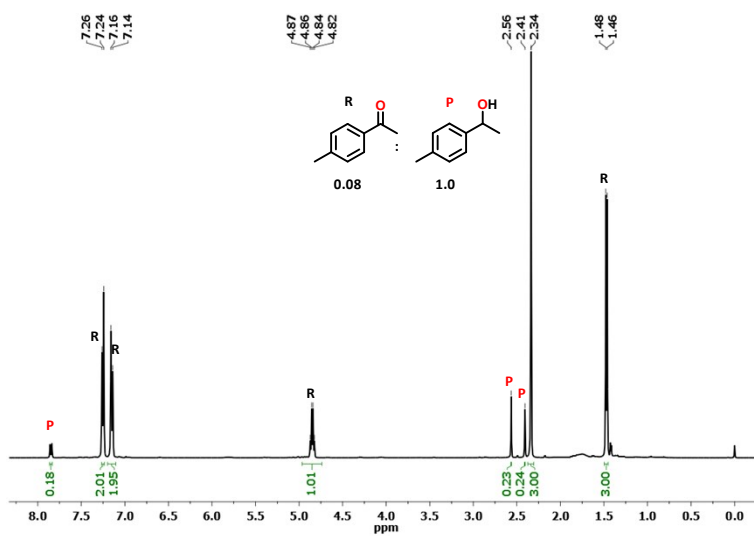

**Figure S83.**  $^1\text{H}$  NMR spectrum of a reaction mixture for the TH of 4-methylacetophenone in  $\text{CDCl}_3$ .

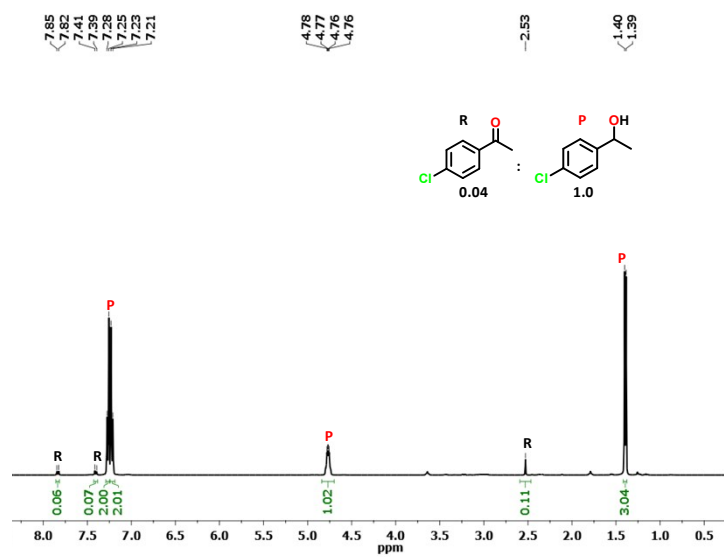

**Figure S84.**  $^1\text{H}$  NMR spectrum of a reaction mixture for the TH of 4-chloroacetophenone in  $\text{CDCl}_3$ .

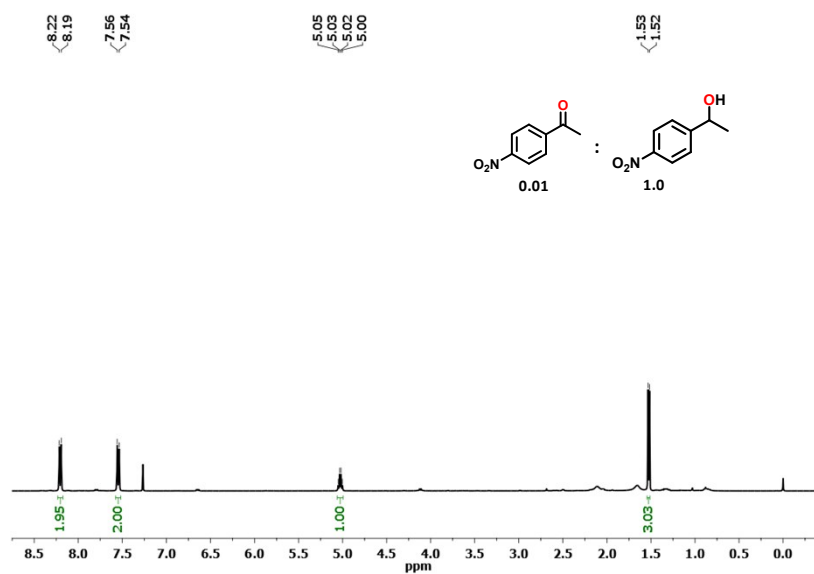

**Figure S85.**  $^1\text{H}$  NMR spectrum of a reaction mixture for the TH of 4-nitroacetophenone in  $\text{CDCl}_3$ .

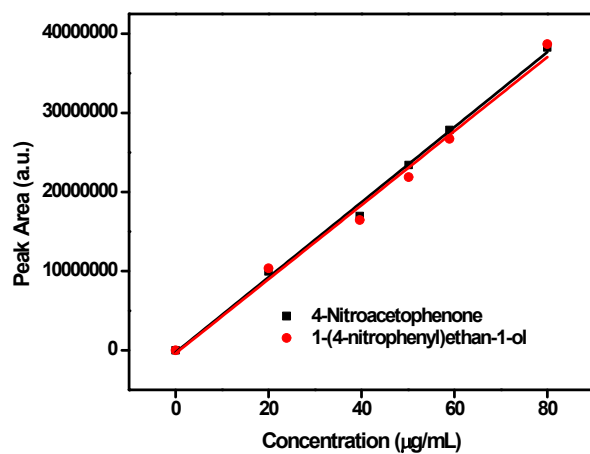

**Figure S86.** GC calibration plot for a mixture of 4-nitroacetophenone and 1-(4-nitrophenyl)ethan-1-ol).

**Table S1.** X-ray data collection and structure refinement parameters for complexes **1-3**.

|                                         | <b>1</b>                                                            | <b>2</b>                                                            | <b>3</b>                                                            |
|-----------------------------------------|---------------------------------------------------------------------|---------------------------------------------------------------------|---------------------------------------------------------------------|
| <b>CCDC No.</b>                         | <b>1993893</b>                                                      | <b>1993892</b>                                                      | <b>1993891</b>                                                      |
| Empirical formula                       | C <sub>26</sub> H <sub>22</sub> ClN <sub>2</sub> O <sub>3</sub> PRu | C <sub>30</sub> H <sub>20</sub> ClN <sub>2</sub> O <sub>3</sub> PRu | C <sub>30</sub> H <sub>20</sub> ClN <sub>2</sub> O <sub>3</sub> PRu |
| Formula weight                          | 577.94                                                              | 623.97                                                              | 623.97                                                              |
| Temperature (K)                         | 298(2)                                                              | 298(2)                                                              | 298(2)                                                              |
| Wavelength (Å)                          | 0.71073                                                             | 0.71073                                                             | 0.71073                                                             |
| Crystal system                          | Monoclinic                                                          | Monoclinic                                                          | Triclinic                                                           |
| Space group                             | <i>I</i> 2/a                                                        | <i>P</i> 2 <sub>1</sub> / <i>n</i>                                  | <i>P</i> $\bar{1}$                                                  |
| Unit cell dimensions                    |                                                                     |                                                                     |                                                                     |
| <i>a</i> (Å)                            | 18.3088(8)                                                          | 8.6093(12)                                                          | 9.9715(4)                                                           |
| <i>b</i> (Å)                            | 8.4872(4)                                                           | 19.520(2)                                                           | 11.0618(4)                                                          |
| <i>c</i> (Å)                            | 32.8245(16)                                                         | 16.0093(18)                                                         | 12.8149(4)                                                          |
| $\alpha^\circ$                          | 90                                                                  | 90                                                                  | 92.082(3)                                                           |
| $\beta^\circ$                           | 101.520(4)                                                          | 101.983(12)                                                         | 98.606(3)                                                           |
| $\gamma^\circ$                          | 90                                                                  | 90                                                                  | 108.609(3)                                                          |
| Volume (Å <sup>3</sup> )                | 4997.9(4)                                                           | 2631.8(6)                                                           | 1319.19(9)                                                          |
| <i>Z</i>                                | 8                                                                   | 4                                                                   | 2                                                                   |
| Density Mg/m <sup>3</sup> (calculated)  | 1.536                                                               | 1.575                                                               | 1.571                                                               |
| Absorption coefficient mm <sup>-1</sup> | 0.829                                                               | 0.794                                                               | 0.792                                                               |
| <i>F</i> (000)                          | 2336                                                                | 1256                                                                | 628                                                                 |
| Crystal size (mm <sup>3</sup> )         | 0.25 x 0.20 x 0.16                                                  | 0.19 x 0.15 x 0.09                                                  | 0.22 x 0.17 x 0.11                                                  |
| Theta range for data collection         | 3.278 to 29.612°                                                    | 3.255 to 30.884°                                                    | 3.498 to 24.999°                                                    |
| Index ranges                            | -25 ≤ <i>h</i> ≤ 25, -11 ≤ <i>k</i> ≤ 11, -45 ≤ <i>l</i> ≤ 45       | -12 ≤ <i>h</i> ≤ 12, -28 ≤ <i>k</i> ≤ 28, 23 ≤ <i>l</i> ≤ 23        | -11 ≤ <i>h</i> ≤ 11, -13 ≤ <i>k</i> ≤ 13, -15 ≤ <i>l</i> ≤ 15       |

|                                                            |                                    |                                    |                                    |
|------------------------------------------------------------|------------------------------------|------------------------------------|------------------------------------|
| Reflections collected                                      | 31483                              | 38198                              | 15256                              |
| Independent reflections                                    | 4384 [ $R(\text{int}) = 0.0556$ ]  | 6858 [ $R(\text{int}) = 0.1200$ ]  | 4637 [ $R(\text{int}) = 0.0259$ ]  |
| Completeness to $\theta = 25^\circ$                        | 99.7 %                             | 99.8 %                             | 99.7 %                             |
| Refinement method                                          | Full-matrix least-squares on $F^2$ | Full-matrix least-squares on $F^2$ | Full-matrix least-squares on $F^2$ |
| Data / restraints / parameters                             | 4384 / 0 / 311                     | 6858 / 0 / 343                     | 4637 / 0 / 343                     |
| Goodness of-fit on $F^2$                                   | 1.023                              | 0.975                              | 1.074                              |
| Final R indices                                            | $R1 = 0.0364$ , $wR2 = 0.0813$     | $R1 = 0.1008$ , $wR2 = 0.2211$     | $R1 = 0.0237$ , $wR2 = 0.0539$     |
| $[I > 2\sigma(I)]$                                         |                                    |                                    |                                    |
| R indices (all data)                                       | $R1 = 0.0466$ , $wR2 = 0.0859$     | $R1 = 0.1840$ , $wR2 = 0.3019$     | $R1 = 0.0265$ , $wR2 = 0.0553$     |
| Largest diff. peak and hole ( $\text{e.}\text{\AA}^{-3}$ ) | 0.641 and -0.376                   | 1.727 and -1.552                   | 0.281 and -0.291                   |

---


$$R1 = \frac{\sum ||F_o| - |F_c||}{\sum |F_o|}; wR = \left\{ \frac{\sum [w(F_o^2 - F_c^2)]}{\sum wF_o^4} \right\}^{1/2}$$

**Table S2.** Selected bond distances ( $\text{\AA}$ ) and bond angles for complexes **1-3**.

| <b>Bond Length<br/>(<math>\text{\AA}</math>)</b> | <b>1</b>  | <b>2</b>  | <b>3</b>  |
|--------------------------------------------------|-----------|-----------|-----------|
| Ru(1)-C(1)                                       | 1.811(4)  | 1.890(10) | 1.877(3)  |
| Ru(1)-N(2)                                       | 2.068(3)  | 2.073(5)  | 2.088(16) |
| Ru(1)-N(1)                                       | 2.141(3)  | 2.112(6)  | 2.174(16) |
| Ru(1)-O(3)                                       | 2.183(2)  | -----     | -----     |
| Ru(1)-P(1)                                       | 2.275(9)  | 2.292(2)  | 2.308(5)  |
| Ru(1)-Cl(1)                                      | 2.408(10) | 2.422(2)  | 2.416(6)  |
| Ru(1)-C(2)                                       | -----     | 1.895(8)  | 1.895(2)  |

| <b>Bond Angles (°)</b> | <b>1</b>   | <b>2</b>   | <b>3</b>  |
|------------------------|------------|------------|-----------|
| C(1)-Ru(1)-N(2)        | 95.40(14)  | 92.6(4)    | 93.00(11) |
| C(1)-Ru(1)-N(1)        | 95.80(13)  | 92.2(3)    | 92.18(9)  |
| N(2)-Ru(1)-N(1)        | 79.11(11)  | 174.5(3)   | 173.08(9) |
| C(1)-Ru(1)-O(3)        | 177.86(14) | 89.0(3)    | 89.26(8)  |
| N(2)-Ru(1)-O(3)        | 86.34(10)  | 105.0(3)   | 106.37(8) |
| N(1)-Ru(1)-O(3)        | 83.31(10)  | 77.7(2)    | 78.28(6)  |
| C(1)-Ru(1)-P(1)        | 91.59(11)  | 89.7(3)    | 89.83(7)  |
| N(2)-Ru(1)-P(1)        | 83.85(8)   | 94.5(3)    | 92.02(7)  |
| N(1)-Ru(1)-P(1)        | 161.97(8)  | 82.89(17)  | 83.41(5)  |
| O(3)-Ru(1)-P(1)        | 89.82(7)   | 160.45(15) | 161.61(5) |
| C(1)-Ru(1)-Cl(1)       | 88.96(13)  | 175.1(2)   | 173.32(7) |
| N(2)-Ru(1)-Cl(1)       | 173.24(8)  | 88.8(3)    | 87.88(8)  |
| N(1)-Ru(1)-Cl(1)       | 95.35(9)   | 86.60(18)  | 87.51(5)  |
| O(3)-Ru(1)-Cl(1)       | 89.19(8)   | 86.1(2)    | 84.13(5)  |
| P(1)-Ru(1)-Cl(1)       | 101.22(3)  | 94.87(7)   | 96.76(2)  |
